# Supplementary material for: Genetic topography and cortical cell loss in Huntington's disease link development and neurodegeneration
Source: PubMed Central journal article supplement (PMC10629790; doi:10.1093/brain/awad275), 2023-08-17
Supplement: awad275_supplementary_data.pdf [file awad275_supplementary_data.pdf]

# **Genetic topography and cortical cell loss in Huntington's disease link development and neurodegeneration**

Supplementary Data

|                                                                                                                                                                                     |    |
|-------------------------------------------------------------------------------------------------------------------------------------------------------------------------------------|----|
| Figure 1 Map depicting the cortical T values obtained from the volumetric analysis comparing HD expansion carriers and controls.....                                                | 2  |
| Figure 2 Map depicting the cortical T values obtained from the mean diffusivity analysis comparing HD expansion carriers and controls.....                                          | 3  |
| Figure 3 Density plots illustrating the distribution of T values from the volumetric (left) and mean diffusivity (right) analyses comparing HD expansion carriers and controls..... | 5  |
| Figure 4 Summary of the analysis between HTT expression and developmental genes.....                                                                                                | 6  |
| Figure 5 Principal component analysis of developmental genes expression in the AHBA.....                                                                                            | 84 |

|                                                                                                                                                                                                                                     |    |
|-------------------------------------------------------------------------------------------------------------------------------------------------------------------------------------------------------------------------------------|----|
| Table 1 Top 10% genes positively associated with cortical volume .....                                                                                                                                                              | 7  |
| Table 2 Top 10% genes negatively associated with cortical volume .....                                                                                                                                                              | 24 |
| Table 3 Top 10% genes positively associated with cortical mean diffusivity .....                                                                                                                                                    | 39 |
| Table 4 Top 10% genes negatively associated with cortical mean diffusivity .....                                                                                                                                                    | 48 |
| Table 5 GO terms enriched in the top 10% of genes positively associated with cortical volume in preHD.....                                                                                                                          | 71 |
| Table 6 GO terms enriched in the top 10% of genes negatively associated with cortical volume in preHD.....                                                                                                                          | 77 |
| Table 7 GO terms enriched in the top 10% of genes positively associated with cortical mean diffusivity in preHD.....                                                                                                                | 78 |
| Table 8 GO terms enriched in the top 10% of genes negatively associated with cortical mean diffusivity in preHD.....                                                                                                                | 81 |
| Table 9 List of genes involved in neurodevelopment.....                                                                                                                                                                             | 83 |
| Table 10 EWCE analysis showing cell types enriched within 10%, 20% and 30% genes positively associated with cortical volume loss using the AIBS single-cell transcription and the DroNC datasets .....                              | 85 |
| Table 11 EWCE analysis showing cell types enriched within 10%, 20% and 30% genes negatively associated with cortical volume loss using the AIBS single-cell transcription and the DroNC datasets .....                              | 87 |
| Table 12 EWCE analysis showing cell types enriched within the top 10%, 20% and 30% genes positively associated with increases in cortical mean diffusivity using the AIBS single-cell transcription and the DroNC-seq datasets..... | 89 |
| Table 13 EWCE analysis showing cell types enriched within the top 10%, 20% and 30% of genes negatively associated with increases in cortical mean diffusivity in the AIBS single-cell transcription and the DroNC-seq datasets..... | 91 |

**Figure 1 Map depicting the cortical T values obtained from the volumetric analysis comparing HD expansion carriers and controls.**

The colorbar represents the magnitude of the T scores (white: black, higher: lower). The T values are unthresholded. HD, Huntington’s disease

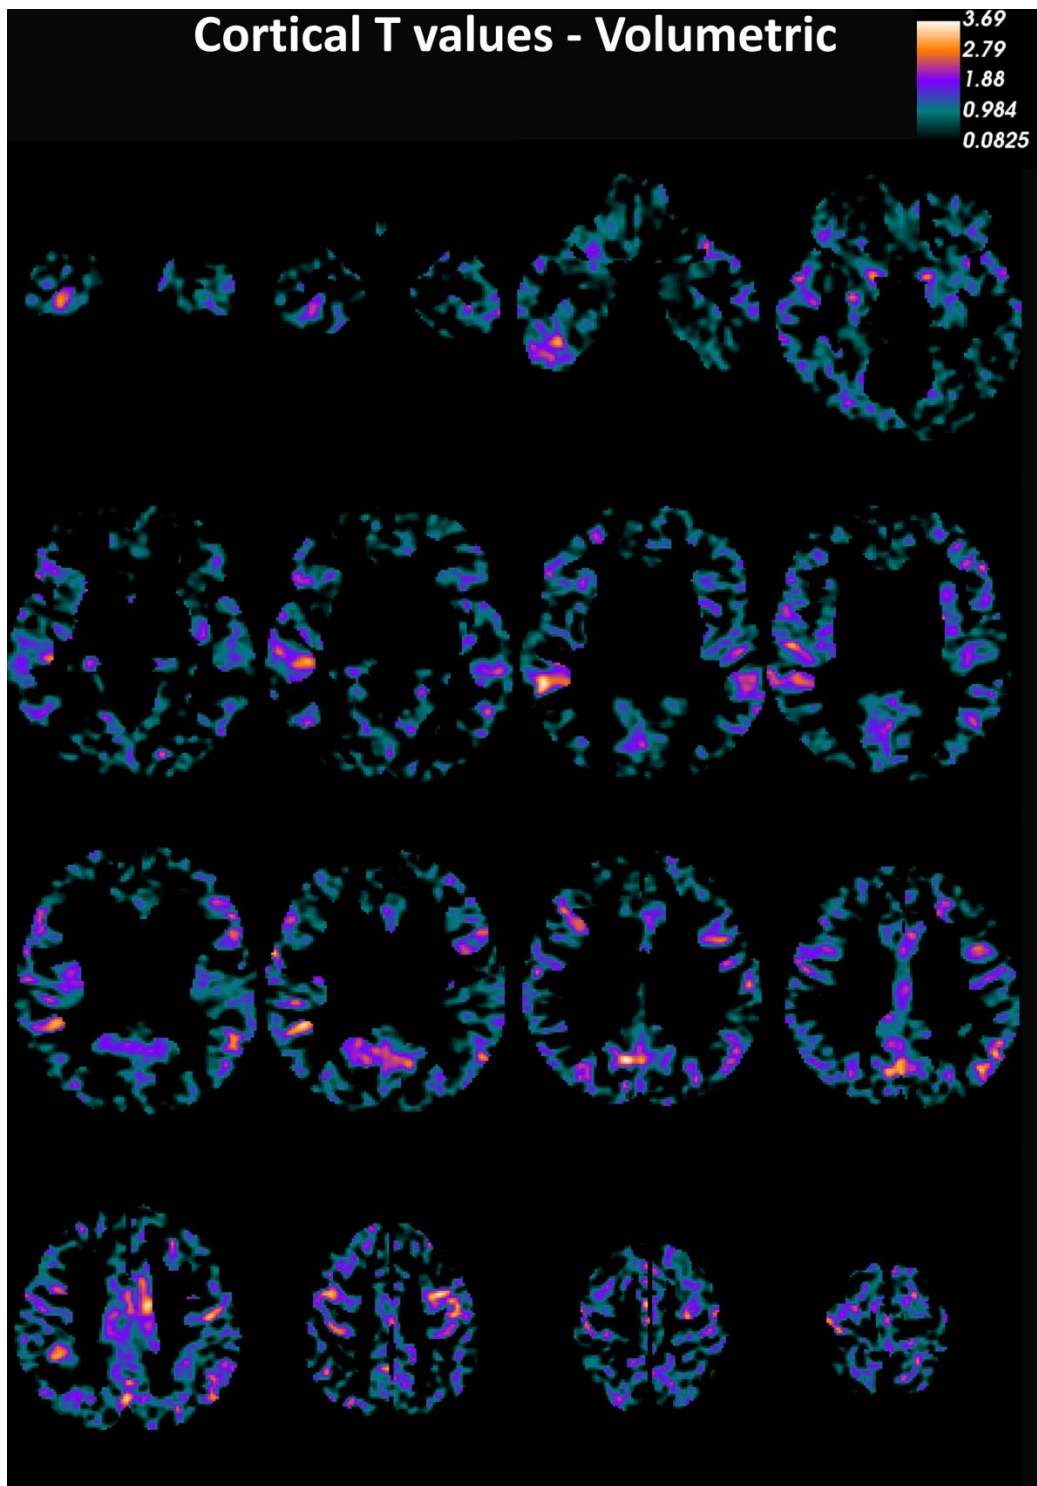

**Figure 2 Map depicting the cortical T values obtained from the mean diffusivity analysis comparing HD expansion carriers and controls.**

The colorbar represents the magnitude of the T scores (white: black, higher: lower). The T values are unthresholded. HD, Huntington's disease

# Cortical T values - Mean Diffusivity

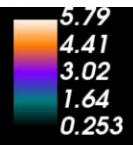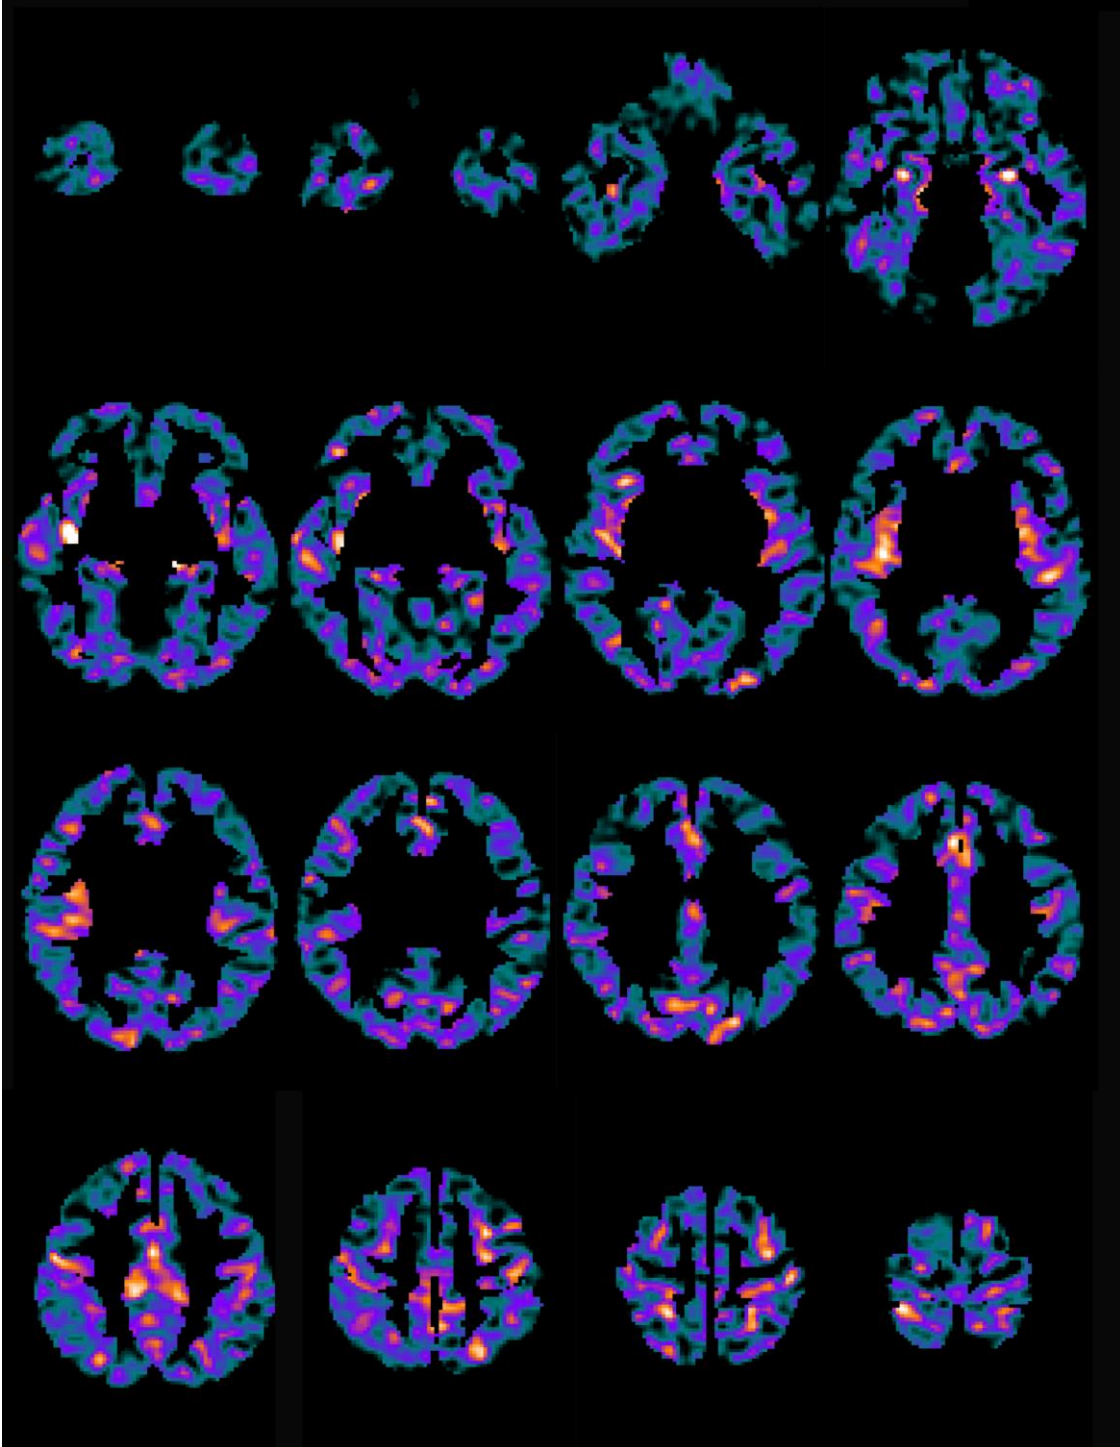

**Figure 3 Density plots illustrating the distribution of T values from the volumetric (left) and mean diffusivity (right) analyses comparing HD expansion carriers and controls**

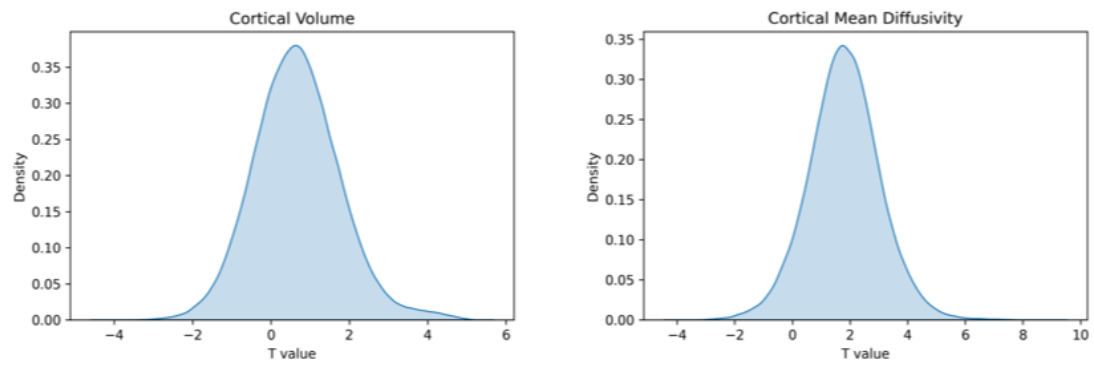

### Figure 4 Summary of the analysis between HTT expression and developmental genes

A set of ten genes known to be differentially expressed during early cortical development was obtained from Kang et al. (Nature, 2011). The gene expression data for *HTT* and developmental genes was extracted from the AHBA across 110 regions of interest (ROIs), including cortical, subcortical (Desikan), and cerebellar (Diedrichsen) regions, using the abagen toolbox.

A principal component analysis was performed in the expression of developmental genes across ROIs. The first principal component was correlated with the expression of *HTT* across ROIs. Significance was determined using the P-spin test and through bootstrapping.

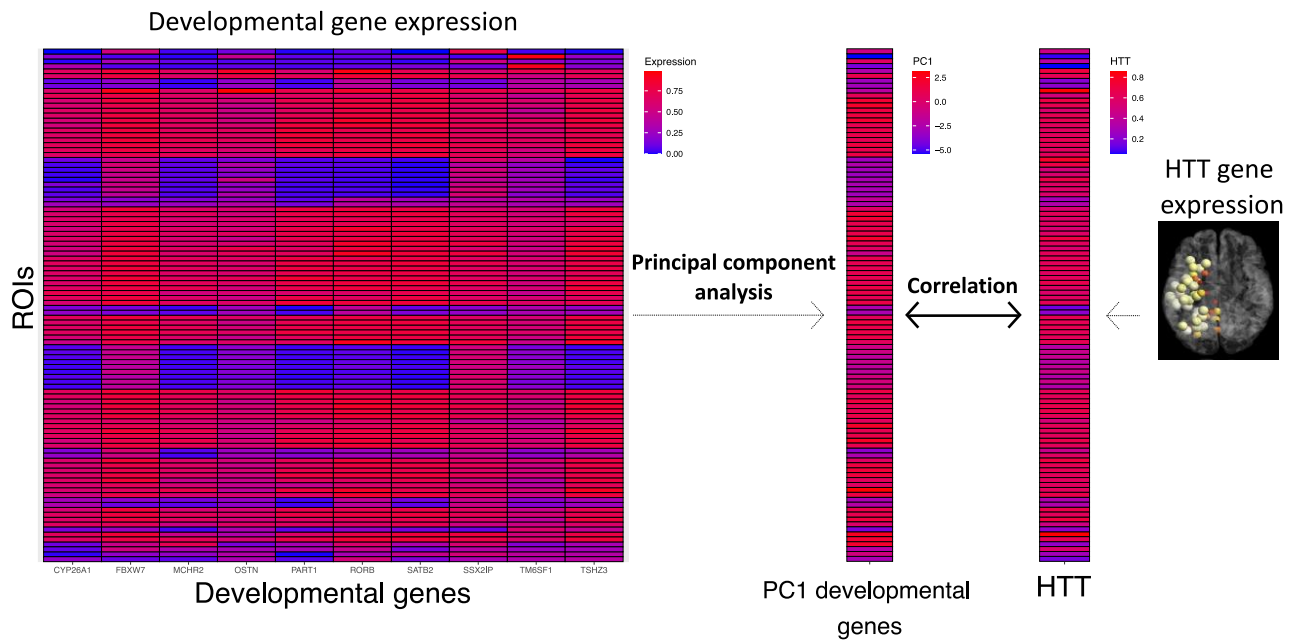

**Table 1 Top 10% genes positively associated with cortical volume**

| <b>Gene</b> | <b>T</b>   |
|-------------|------------|
| GLI1        | 3.88580107 |
| HIST1H3H    | 3.39847815 |
| FMO2        | 3.26389359 |
| ITGA11      | 3.2124481  |
| BGN         | 3.15524776 |
| PTGER1      | 3.0864971  |
| SNAI2       | 3.0674731  |
| ID3         | 2.9616936  |
| ACO1        | 2.95740139 |
| PMAIP1      | 2.91425275 |
| GINS2       | 2.90816321 |
| PECAM1      | 2.89622113 |
| NPY2R       | 2.88353433 |
| VASH2       | 2.88066286 |
| TRPS1       | 2.85790295 |
| TRAF3IP2    | 2.84642471 |
| BMP6        | 2.8111231  |
| PPP1R3B     | 2.8037253  |
| TM4SF18     | 2.76617085 |
| CXCR4       | 2.6840766  |
| FAM117A     | 2.68270284 |
| GPR182      | 2.68246512 |
| CDH23       | 2.60900539 |
| PDLIM4      | 2.59084608 |
| NFIA        | 2.58738402 |
| HAP1        | 2.57256284 |
| TIMP3       | 2.56715779 |
| APOLD1      | 2.56564361 |
| PERP        | 2.56535708 |
| PLOD2       | 2.54054722 |
| FOXC2       | 2.53534146 |
| NRN1L       | 2.53463101 |
| NUP188      | 2.52810064 |
| CYR1        | 2.49024649 |
| ME1         | 2.48732351 |
| THBS4       | 2.46920629 |
| PTGES       | 2.45477841 |
| FOXO1       | 2.44808126 |
| VANGL1      | 2.44791166 |
| GBE1        | 2.43408656 |

|          |            |
|----------|------------|
| PLEKHA7  | 2.40271812 |
| THSD4    | 2.39768845 |
| TMEM215  | 2.36333168 |
| MATN3    | 2.34909877 |
| GPR39    | 2.34649896 |
| IL7R     | 2.33829496 |
| C22orf15 | 2.33495334 |
| FAM181A  | 2.33470644 |
| HDAC7    | 2.33457572 |
| SLC39A8  | 2.32911191 |
| GALR3    | 2.32722194 |
| PARP10   | 2.32363115 |
| NINL     | 2.31362078 |
| KLHL1    | 2.29934257 |
| TRIL     | 2.29901214 |
| GABRE    | 2.28803047 |
| AVPR2    | 2.2774752  |
| VANGL2   | 2.27520983 |
| RAB33B   | 2.26582196 |
| CCDC6    | 2.26446436 |
| PDE11A   | 2.26005054 |
| ITGA6    | 2.25996385 |
| EPB41L4A | 2.25142763 |
| PELI2    | 2.24852174 |
| ZNRF3    | 2.24634436 |
| SPATA18  | 2.2391544  |
| LAPTM4A  | 2.2323171  |
| DNAH12   | 2.22917396 |
| COMP     | 2.22650656 |
| GLUL     | 2.21962672 |
| HPR      | 2.21754523 |
| HLA-G    | 2.21524752 |
| AQP5     | 2.21524528 |
| RAET1K   | 2.20745743 |
| ZSCAN1   | 2.20187657 |
| CRB1     | 2.19903604 |
| SYPL2    | 2.1890825  |
| TUBB2B   | 2.18555866 |
| AIRE     | 2.18352414 |
| CDSN     | 2.18257181 |
| TBX19    | 2.17964303 |
| ZIC3     | 2.15402555 |
| OR5B17   | 2.1479751  |



|          |            |
|----------|------------|
| TIE1     | 2.14376036 |
| ACR      | 2.14094043 |
| AEBP1    | 2.1378673  |
| LFNG     | 2.13534109 |
| KLHL13   | 2.13392929 |
| MGST2    | 2.12516246 |
| LYPD2    | 2.12487237 |
| IRGC     | 2.12149359 |
| CTGF     | 2.1194305  |
| PLAGL2   | 2.11313983 |
| C11orf16 | 2.11184703 |
| EPCAM    | 2.11009803 |
| SLC7A10  | 2.10443007 |
| PPP1R13L | 2.09981952 |
| USP49    | 2.09704019 |
| MYCT1    | 2.0938603  |
| CA5A     | 2.08752301 |
| S1PR1    | 2.08723955 |
| HMGCR    | 2.08572608 |
| SYDE1    | 2.08414121 |
| S100A4   | 2.07207849 |
| PRKCH    | 2.0707388  |
| GPR4     | 2.06958381 |
| PXDN     | 2.06945497 |
| SLC26A2  | 2.06704051 |
| CDR1     | 2.06370601 |
| LOXL1    | 2.06170005 |
| PIRT     | 2.05539544 |
| LRRTM2   | 2.05428883 |
| PPIC     | 2.05116533 |
| TP53INP1 | 2.0510653  |
| ITGA9    | 2.0496379  |
| PPBP     | 2.04459272 |
| MYOD1    | 2.039352   |
| GBP2     | 2.0369293  |
| GPBAR1   | 2.0355497  |
| LRIG1    | 2.03257702 |
| IGFN1    | 2.03002517 |
| HSD3B7   | 2.02507047 |
| SYNPR    | 2.02207339 |
| ITGA1    | 2.02168711 |
| MICA     | 2.01996738 |
| EDN3     | 2.01933677 |

|          |            |
|----------|------------|
| PLSCR4   | 2.01908473 |
| WT1-AS   | 2.01650593 |
| ERG      | 2.01373598 |
| SLITRK6  | 2.00843479 |
| FSTL5    | 2.00424786 |
| MED25    | 1.99920916 |
| LAG3     | 1.99844612 |
| MYH11    | 1.99543516 |
| OR52W1   | 1.99371016 |
| TMED10P1 | 1.99076191 |
| TTC36    | 1.989561   |
| WFDC12   | 1.98945955 |
| CXCR3    | 1.98889918 |
| MYEOV    | 1.98858878 |
| ITGB4    | 1.98852782 |
| PGAM2    | 1.98569344 |
| SMO      | 1.9849048  |
| BHMT2    | 1.98199314 |
| SLC38A5  | 1.97819895 |
| C1orf226 | 1.9754995  |
| CLDN14   | 1.97491332 |
| FKBP10   | 1.97447818 |
| SLC38A2  | 1.9712322  |
| SNX33    | 1.96977071 |
| CBR3     | 1.968428   |
| HTRA3    | 1.9622445  |
| SLC2A10  | 1.96092165 |
| SLC22A31 | 1.9606276  |
| KCNK7    | 1.95134379 |
| TGIF1    | 1.94696713 |
| LALBA    | 1.94615627 |
| CRB3     | 1.94567124 |
| PRRX2    | 1.93776174 |
| ZSCAN22  | 1.93619924 |
| ITGA7    | 1.93452595 |
| N4BP2    | 1.93329367 |
| AMN      | 1.93208044 |
| SLC25A20 | 1.92966746 |
| RCOR2    | 1.92959624 |
| MLPH     | 1.92555451 |
| PRX      | 1.92260883 |
| NCF4     | 1.92069507 |
| LRRN1    | 1.91780997 |

|           |            |
|-----------|------------|
| FAM201A   | 1.91631036 |
| GRP       | 1.91629273 |
| TRIM71    | 1.91563104 |
| TTPA      | 1.9148975  |
| PBXIP1    | 1.91311339 |
| NPW       | 1.90461061 |
| SRPX      | 1.90275115 |
| CCT5      | 1.89907087 |
| GPR153    | 1.89691028 |
| CGNL1     | 1.89243495 |
| INSIG1    | 1.89230976 |
| BTN3A3    | 1.89188584 |
| SPRR1A    | 1.88850588 |
| IFIH1     | 1.88160627 |
| NXNL2     | 1.8781233  |
| LOC441204 | 1.87797139 |
| HEYL      | 1.87634381 |
| SSX5      | 1.87445228 |
| FOXD3     | 1.87444365 |
| IFIT3     | 1.87253933 |
| SLC4A4    | 1.86856036 |
| MTTP      | 1.8654234  |
| PLCB4     | 1.86458691 |
| CPEB3     | 1.86364234 |
| SERPINH1  | 1.85981342 |
| CHST7     | 1.85969983 |
| RNF135    | 1.85549291 |
| DACT1     | 1.85351138 |
| MOV10     | 1.85298491 |
| PCMTD2    | 1.85168968 |
| KLHDC10   | 1.85168923 |
| SBF1P1    | 1.84874777 |
| NTSR2     | 1.84243373 |
| FBXO46    | 1.84215003 |
| C1QL2     | 1.84192103 |
| SLC22A5   | 1.84186478 |
| LRCH2     | 1.84163211 |
| RHOD      | 1.84162936 |
| WFDC8     | 1.83974795 |
| LCA5      | 1.83785919 |
| EVX1      | 1.83775372 |
| BMP1      | 1.83398955 |
| PTN       | 1.8339746  |

|            |            |
|------------|------------|
| TMEM40     | 1.83224115 |
| MCM3AP-AS1 | 1.83061237 |
| MSLN       | 1.82992813 |
| CPVL       | 1.82970201 |
| HLA-F      | 1.8260819  |
| SPINK8     | 1.82356548 |
| ZNF843     | 1.82270366 |
| MMP14      | 1.82212925 |
| CTF1       | 1.82144408 |
| CASKIN1    | 1.82090236 |
| CDH6       | 1.8198467  |
| HIST1H3B   | 1.81869053 |
| TMEM72     | 1.81774457 |
| IGFBP7     | 1.81635135 |
| DERA       | 1.81564731 |
| ANXA1      | 1.81523378 |
| CRCT1      | 1.81266626 |
| PRRX1      | 1.81246481 |
| DHH        | 1.81097889 |
| OR5H1      | 1.80819897 |
| GBP3       | 1.80611047 |
| CARD10     | 1.80469638 |
| GP9        | 1.80388743 |
| BEST3      | 1.79956138 |
| HOXA3      | 1.79872925 |
| PTH2       | 1.79671494 |
| FAM84B     | 1.79617956 |
| PI3        | 1.79603274 |
| PAX8       | 1.7928923  |
| ADORA2B    | 1.79281805 |
| HS3ST5     | 1.79223807 |
| NFIB       | 1.79189092 |
| PLEKHA4    | 1.78957282 |
| APLNR      | 1.78876088 |
| PDGFC      | 1.78790743 |
| ALS2CL     | 1.78670707 |
| RBPM52     | 1.78570878 |
| IDH1       | 1.78522671 |
| LGR6       | 1.78349776 |
| TPSG1      | 1.78180475 |
| SMCR8      | 1.77912863 |
| IGF2BP2    | 1.77893752 |

|           |            |
|-----------|------------|
| SP7       | 1.77776256 |
| FGR       | 1.77553796 |
| GCLM      | 1.77456628 |
| COL7A1    | 1.77431829 |
| MXRA8     | 1.77112888 |
| PBX4      | 1.76874206 |
| PHYHD1    | 1.76744834 |
| SLC9A9    | 1.76686527 |
| PMEPA1    | 1.76633549 |
| SOX18     | 1.76608965 |
| HPDL      | 1.76507558 |
| ANP32E    | 1.76238433 |
| NHSL1     | 1.76160322 |
| TERT      | 1.75999271 |
| IVL       | 1.7597108  |
| KRTAP12-1 | 1.75824315 |
| TMEM88B   | 1.75813577 |
| THSD1     | 1.75763209 |
| SALL2     | 1.75658035 |
| ZBED4     | 1.75652844 |
| EPHX2     | 1.75457998 |
| PCSK9     | 1.75353906 |
| TNC       | 1.75104736 |
| ADAMTS2   | 1.74897918 |
| ALAS2     | 1.74616793 |
| PLBD1     | 1.74533932 |
| KIF26A    | 1.7414113  |
| SOX8      | 1.74104118 |
| ODF3L1    | 1.74003394 |
| TAS2R39   | 1.73940922 |
| PRKX      | 1.73888121 |
| LCE1F     | 1.7385824  |
| ENTPD2    | 1.7384396  |
| ADCY4     | 1.73815302 |
| EFCAB6    | 1.73751852 |
| SCGB3A1   | 1.73696595 |
| OLFML2A   | 1.73544255 |
| TFF3      | 1.73401257 |
| DCHS1     | 1.73128843 |
| MYD88     | 1.73027822 |
| GAB4      | 1.72603352 |
| SRP72     | 1.72551573 |
| PDGFRB    | 1.72391867 |

|                |            |
|----------------|------------|
| MAP3K2         | 1.72386049 |
| MGAT4C         | 1.72215846 |
| FAM129B        | 1.71991754 |
| LRRC17         | 1.71968286 |
| CXCL2          | 1.71898237 |
| IFI27          | 1.71865916 |
| TES            | 1.71855303 |
| MICALL1        | 1.71763489 |
| FAM43A         | 1.716894   |
| KLK2           | 1.71679224 |
| SLC16A8        | 1.71315884 |
| SLCO2A1        | 1.71263707 |
| ZNF274         | 1.71161213 |
| PRDM6          | 1.71127779 |
| KRTAP5-10      | 1.70945038 |
| ACAA2          | 1.70880965 |
| DDR2           | 1.70868924 |
| SLC44A2        | 1.70856686 |
| KDSR           | 1.70801075 |
| GJB3           | 1.70782356 |
| ITM2C          | 1.70757391 |
| ADARB2-<br>AS1 | 1.70739892 |
| SASH1          | 1.70698142 |
| KRTAP20-2      | 1.70525861 |
| CEP170         | 1.70481233 |
| EIF3M          | 1.70403822 |
| LYPD1          | 1.70193046 |
| RGR            | 1.7018399  |
| CPNE3          | 1.70103748 |
| KRTAP10-9      | 1.70063113 |
| DKK4           | 1.6994777  |
| APOA1          | 1.69772392 |
| PON2           | 1.69397514 |
| FXN            | 1.69334962 |
| LY9            | 1.69287641 |
| LINC00475      | 1.69251296 |
| ABCB1          | 1.6912022  |
| KCNJ16         | 1.68957346 |
| GRIK4          | 1.6886129  |
| MGC70870       | 1.68677068 |
| PLTP           | 1.68590171 |
| GPR63          | 1.68539826 |

|          |            |
|----------|------------|
| GNA13    | 1.68507464 |
| LCE3A    | 1.68136641 |
| LAMB2    | 1.67917282 |
| OXER1    | 1.67760521 |
| SYCP2    | 1.67702123 |
| ARL4A    | 1.67630127 |
| IRX4     | 1.67614539 |
| KCNIP2   | 1.67366191 |
| RBM43    | 1.67280252 |
| ITPRIP   | 1.67038775 |
| GANAB    | 1.67022886 |
| NEUROG1  | 1.6698939  |
| SLC7A5   | 1.66947425 |
| HLA-L    | 1.6693273  |
| ATP4A    | 1.66885171 |
| CRYL1    | 1.66799988 |
| FFAR1    | 1.66587188 |
| MRVI1    | 1.66581502 |
| TTN      | 1.66292282 |
| RETN     | 1.66254883 |
| NPTX1    | 1.6596038  |
| RGMB     | 1.65358193 |
| HGF      | 1.6528458  |
| HLA-DQB2 | 1.65280975 |
| PLA2G15  | 1.64993604 |
| ALS2CR12 | 1.64579507 |
| ATP7A    | 1.64514238 |
| GLUD1    | 1.64414642 |
| TOP1P2   | 1.64284231 |
| GNG11    | 1.64132685 |
| NLRC3    | 1.64089089 |
| CADM2    | 1.64068866 |
| ARTN     | 1.63945431 |
| PHF21B   | 1.63862014 |
| C10orf99 | 1.63842157 |
| ACP5     | 1.63719851 |
| H6PD     | 1.63498889 |
| GH2      | 1.63404681 |
| GPR157   | 1.63131855 |
| LHFPL5   | 1.63025548 |
| PTGIR    | 1.62951425 |
| ARID4A   | 1.62941849 |
| C6orf201 | 1.62897482 |

|          |            |
|----------|------------|
| BTN3A2   | 1.62818115 |
| ACTA2    | 1.6276856  |
| HEG1     | 1.6275141  |
| TMEM100  | 1.62738181 |
| HSD17B7  | 1.6270911  |
| OTX1     | 1.62699228 |
| MTMR9LP  | 1.62662158 |
| KIAA1586 | 1.62649152 |
| TSPAN10  | 1.62643847 |
| ATP2C2   | 1.62475436 |
| PALMD    | 1.62446382 |
| PTGR1    | 1.62443512 |
| ACTL6A   | 1.62307494 |
| COL18A1  | 1.62302814 |
| ABCG2    | 1.62301659 |
| ATG4A    | 1.62199    |
| POLE2    | 1.61943394 |
| CLASP1   | 1.61769914 |
| DNAH2    | 1.61549543 |
| ADAD2    | 1.61544047 |
| PIGA     | 1.61536315 |
| SPIN4    | 1.61518957 |
| MED17    | 1.61498737 |
| SECTM1   | 1.61429387 |
| PHOX2A   | 1.61401249 |
| PCOLCE   | 1.61293905 |
| C16orf92 | 1.61290203 |
| PIPOX    | 1.61253823 |
| ATP8B3   | 1.61181064 |
| ADAMTS9  | 1.61168329 |
| GNB3     | 1.61137177 |
| CYTL1    | 1.60979194 |
| KISS1    | 1.60852537 |
| PTPN18   | 1.60849145 |
| GOLIM4   | 1.60768604 |
| SBK2     | 1.60747361 |
| CYP11A1  | 1.60599238 |
| ANTXR2   | 1.60588241 |
| GDPD2    | 1.60465658 |
| IRF2     | 1.60344927 |
| ANKRD18A | 1.60040368 |
| LMAN1L   | 1.5999479  |
| TMBIM4   | 1.59958959 |



|           |            |
|-----------|------------|
| ANKRD33   | 1.59871304 |
| SDK1      | 1.59592171 |
| TUBA3C    | 1.5946917  |
| F2R       | 1.59421627 |
| GLCCI1    | 1.59367367 |
| KRTAP12-4 | 1.59317274 |
| SLC12A4   | 1.59297899 |
| PHLPP1    | 1.59286169 |
| DDX58     | 1.59237458 |
| COL16A1   | 1.59217361 |
| ABCB7     | 1.59207904 |
| ACP6      | 1.58969156 |
| CNR1      | 1.58926709 |
| EPHA8     | 1.58861088 |
| UCN2      | 1.58826416 |
| IFITM5    | 1.58780211 |
| DMGDH     | 1.58773131 |
| PSORS1C2  | 1.58649099 |
| NXF3      | 1.58522662 |
| DPT       | 1.58202726 |
| AR        | 1.58132742 |
| CD44      | 1.58093265 |
| PLAC8L1   | 1.58075863 |
| Mar-03    | 1.57925391 |
| MYCN      | 1.57880575 |
| CPAMD8    | 1.57874355 |
| KRTAP5-11 | 1.57794051 |
| NFATC1    | 1.57728216 |
| TMEM52    | 1.57716591 |
| SEMA4A    | 1.57705037 |
| GOLPH3L   | 1.57672781 |
| KRT19     | 1.57629223 |
| C5orf22   | 1.5758246  |
| SOX13     | 1.57540123 |
| HSPA1A    | 1.57464874 |
| RNF152    | 1.57423979 |
| RYR1      | 1.57223851 |
| TBX5      | 1.57169997 |
| CLPS      | 1.57010199 |
| ZG16B     | 1.5698743  |
| ARL4D     | 1.56914737 |
| ZMIZ1     | 1.56909268 |
| BAHD1     | 1.56702092 |

|           |            |
|-----------|------------|
| SOX4      | 1.56575696 |
| ADPGK     | 1.5656415  |
| NKX2-6    | 1.56508377 |
| USP37     | 1.56454582 |
| ITM2A     | 1.56152957 |
| THUMPD1   | 1.56086404 |
| PLG       | 1.55965357 |
| COL1A2    | 1.55944845 |
| EDNRB     | 1.55835177 |
| ITM2B     | 1.55772622 |
| EMCN      | 1.55653596 |
| FOXL2     | 1.55651903 |
| CC2D2A    | 1.5540975  |
| SOX17     | 1.55309245 |
| SLC7A11   | 1.55273932 |
| SEMA3A    | 1.55194612 |
| AMZ1      | 1.54989127 |
| MT1L      | 1.54918778 |
| AQP6      | 1.54907058 |
| FOXC1     | 1.54895195 |
| SFT2D3    | 1.54882637 |
| DCST2     | 1.54838844 |
| S1PR4     | 1.54726579 |
| SPRYD4    | 1.54700818 |
| KRTAP10-5 | 1.54664758 |
| DLK2      | 1.54539967 |
| ITPR3     | 1.54352031 |
| FBLN2     | 1.54178314 |
| STAG2     | 1.54013606 |
| KRTAP8-1  | 1.5401033  |
| UPK3A     | 1.53998619 |
| GOLGA8A   | 1.53934894 |
| BEND7     | 1.53900115 |
| MAP2K3    | 1.5384765  |
| NET1      | 1.53829639 |
| ZAN       | 1.53599658 |
| MSX1      | 1.5350488  |
| CLDN5     | 1.53384251 |
| SGK494    | 1.53360399 |
| OR5V1     | 1.53276612 |
| SYNPO2L   | 1.53265263 |
| DBI       | 1.53215332 |
| CXCL14    | 1.53171232 |

|          |            |
|----------|------------|
| CRYBB3   | 1.53157725 |
| A4GALT   | 1.53114951 |
| GKN1     | 1.53003677 |
| ZBTB12   | 1.52999848 |
| GPR25    | 1.52988752 |
| MAOA     | 1.52726369 |
| KDM5B    | 1.52570545 |
| FGF3     | 1.52553302 |
| CSRP2    | 1.52517202 |
| THBS1    | 1.52484008 |
| A2M      | 1.52472133 |
| TBCCD1   | 1.52471024 |
| PEX11A   | 1.52462312 |
| COL6A3   | 1.52359249 |
| GIMAP7   | 1.52287353 |
| ZNF208   | 1.52273424 |
| ECSCR    | 1.52265934 |
| SQLE     | 1.521965   |
| KRTAP6-1 | 1.52075795 |
| DNMBP    | 1.5203733  |
| GNRH2    | 1.51873967 |
| SOD3     | 1.51834972 |
| CLCN1    | 1.5167321  |
| ZNF596   | 1.51623327 |
| NFRKB    | 1.51608616 |
| IER5     | 1.51602392 |
| REM2     | 1.51563842 |
| BMPR2    | 1.51538243 |
| PDE6G    | 1.51494807 |
| PLVAP    | 1.51412229 |
| ABCB6    | 1.5134354  |
| FEM1A    | 1.51343174 |
| CAMK2G   | 1.51329943 |
| CDH16    | 1.51324896 |
| SCRT2    | 1.51297481 |
| ZNF784   | 1.51133595 |
| SERINC1  | 1.51128986 |
| LIX1     | 1.51065595 |
| BTNL2    | 1.50948568 |
| ART3     | 1.5055337  |
| DCAF12L2 | 1.50375826 |
| NXT2     | 1.50370623 |
| KLF15    | 1.50309133 |

|           |            |
|-----------|------------|
| KRTAP10-3 | 1.50282828 |
| UG0898H09 | 1.50274304 |
| AQP2      | 1.50269611 |
| KRTAP19-1 | 1.50268799 |
| LOC728024 | 1.50224944 |
| HES5      | 1.50140092 |
| FAM83E    | 1.50094254 |
| HSD11B1   | 1.49971704 |
| GPR37L1   | 1.49870052 |
| RASL12    | 1.49675874 |
| SPRR2C    | 1.4966677  |
| AGT       | 1.49651257 |
| RPS6KA6   | 1.49574661 |
| SLC1A3    | 1.495367   |
| DEFB115   | 1.49168366 |
| MT1B      | 1.49158473 |
| SENP6     | 1.49126278 |
| P2RX3     | 1.49019498 |
| OR1E1     | 1.48997699 |
| RAB34     | 1.48955151 |
| TCF15     | 1.48899978 |
| KDM5A     | 1.4887226  |
| ID4       | 1.48859161 |
| COX6B2    | 1.48836381 |
| KRTAP21-1 | 1.48780274 |
| EIF3IP1   | 1.48745866 |
| NAGS      | 1.48661299 |
| PTCD3     | 1.48565866 |
| LINC00304 | 1.48262356 |
| NCAPG2    | 1.48262017 |
| NEK8      | 1.48256889 |
| KRTAP2-1  | 1.481509   |
| GPAM      | 1.48123907 |
| RTN4RL2   | 1.48095916 |
| VAX2      | 1.48092235 |
| SLC44A3   | 1.48056822 |
| WNT11     | 1.47985091 |
| ISM2      | 1.47783488 |
| ARSK      | 1.47703213 |
| ISLR2     | 1.475702   |
| ZC3HAV1L  | 1.47368698 |
| MYL3      | 1.47332286 |
| ZSWIM5    | 1.47287257 |

|                |            |
|----------------|------------|
| MYOG           | 1.47242601 |
| ZFP36L2        | 1.47191025 |
| CKMT2          | 1.47097046 |
| CAV1           | 1.46995112 |
| SLC2A4RG       | 1.46960535 |
| DARS           | 1.46957289 |
| PDYN           | 1.46909135 |
| FAM47C         | 1.46776796 |
| CD81           | 1.46748698 |
| ACTG2          | 1.46715824 |
| CD27           | 1.46703987 |
| TRIM49         | 1.46556306 |
| GTF3C4         | 1.46549248 |
| TMEM30B        | 1.46429631 |
| OR10H2         | 1.46074202 |
| TMEM150A       | 1.46071478 |
| MAMSTR         | 1.46025823 |
| BMP2           | 1.45984885 |
| SERPINE2       | 1.4594558  |
| REC8           | 1.45934062 |
| GSTM3          | 1.45855166 |
| DGKG           | 1.45854496 |
| MUC2           | 1.45820001 |
| SHANK2-<br>AS3 | 1.45722475 |
| SPNS3          | 1.45616948 |
| KRTAP5-3       | 1.45614901 |
| FGFRL1         | 1.45521095 |
| SLC1A2         | 1.45516571 |
| KCNIP1         | 1.45373429 |
| ZNF648         | 1.45346237 |
| KBTBD6         | 1.45320318 |
| CCR3           | 1.45211803 |
| MYADML         | 1.45205326 |
| BARX1          | 1.45152948 |
| GNLY           | 1.45115748 |
| ZNF229         | 1.44912347 |
| NPC2           | 1.44718734 |
| TTC38          | 1.44649467 |
| ELN            | 1.44643263 |
| GEM            | 1.44561553 |
| BTBD17         | 1.44530524 |
| EIF2AK3        | 1.44435164 |

|           |            |
|-----------|------------|
| LAMA1     | 1.44340171 |
| CD109     | 1.44322798 |
| MMP9      | 1.44302021 |
| GPR152    | 1.44246749 |
| ASAP3     | 1.44229748 |
| PPP1R1A   | 1.44192169 |
| CHST14    | 1.44097037 |
| MT1X      | 1.44090391 |
| BCL11B    | 1.4402234  |
| RBM12     | 1.439246   |
| CDK4      | 1.43820658 |
| GCK       | 1.43780099 |
| KRTAP20-1 | 1.43604044 |
| HPSE2     | 1.43517207 |
| DNMT3B    | 1.43455793 |
| SLFN11    | 1.43443476 |
| ST7-AS1   | 1.43440608 |
| STK33     | 1.43394678 |
| RRN3      | 1.43385748 |
| ZFHX4     | 1.43380117 |
| BLCAP     | 1.43369846 |
| PDCD5     | 1.43322291 |
| EFNB1     | 1.43307396 |
| PDLIM5    | 1.43302106 |
| ULBP1     | 1.43143349 |
| PDP1      | 1.43056733 |
| SCG2      | 1.42923835 |
| LY6G5C    | 1.42803728 |
| LEPROT    | 1.42635517 |
| FAM167A   | 1.42558407 |
| XCR1      | 1.42501923 |
| CALCA     | 1.42424975 |
| NLRC5     | 1.42185501 |
| IRX3      | 1.42181264 |
| LMO2      | 1.42169888 |
| CCR9      | 1.42110144 |
| BNIPL     | 1.41907105 |
| PPARA     | 1.41836638 |
| NPAS3     | 1.4170174  |
| TMEM120B  | 1.41629326 |
| LCE2D     | 1.41622794 |
| BIRC3     | 1.4160589  |
| OR2Z1     | 1.41590257 |

|           |            |
|-----------|------------|
| TNFRSF12A | 1.41486989 |
| PLRG1     | 1.41483204 |
| ITGAV     | 1.41455424 |
| UHRF1     | 1.41399719 |

**Table 2 Top 10% genes negatively associated with cortical volume**

| <b>Gene</b> | <b>T</b>    |
|-------------|-------------|
| PPM1L       | -3.29551384 |
| GRB14       | -3.24792976 |
| COL10A1     | -3.10444295 |
| FAM162B     | -3.08467349 |
| NELL1       | -2.87059658 |
| AMACR       | -2.8461087  |
| BAIAP2L2    | -2.74602815 |
| PKD2L1      | -2.66747213 |
| CDK5R1      | -2.64009071 |
| COL5A2      | -2.62711306 |
| MRPS30      | -2.61976925 |
| KRT83       | -2.61765496 |
| C1QA        | -2.58965417 |
| SCN8A       | -2.4975413  |
| RPS19BP1    | -2.48523945 |
| LRRC6       | -2.48327837 |
| NUDT14      | -2.48013273 |
| LCN15       | -2.47661674 |
| PTTG1       | -2.4711451  |
| ZNF717      | -2.46440991 |
| SLC36A1     | -2.44312456 |
| TTR         | -2.41185023 |
| FAM49A      | -2.39116565 |
| FAM182B     | -2.37808979 |
| TMEM65      | -2.36718555 |
| RPS24       | -2.34676723 |
| CDT1        | -2.34534546 |
| COL19A1     | -2.34274626 |
| PHLDA2      | -2.32332855 |
| CAMK4       | -2.32054714 |
| UST         | -2.30227162 |
| NOV         | -2.30002486 |
| COL24A1     | -2.29010284 |
| ZNRF2       | -2.27623914 |
| TRAPPC1     | -2.27431928 |
| RASGRF1     | -2.26516357 |
| C1QB        | -2.26257398 |
| ISG15       | -2.25266104 |
| DBNDD1      | -2.24294098 |
| SHROOM3     | -2.23809376 |



|           |             |
|-----------|-------------|
| RARB      | -2.23261251 |
| PTTG2     | -2.21600345 |
| SLC2A5    | -2.21341536 |
| FGF17     | -2.21244588 |
| TYROBP    | -2.18208791 |
| RDH12     | -2.1791099  |
| ENTPD4    | -2.16246471 |
| SIGLEC14  | -2.15573022 |
| CRYBB2P1  | -2.14569079 |
| PPIAL4G   | -2.13165139 |
| CARTPT    | -2.12139593 |
| SAMD14    | -2.11295936 |
| RPS21     | -2.11199667 |
| OLFM3     | -2.10999371 |
| GABRB2    | -2.10507687 |
| USE1      | -2.10166197 |
| FSD1      | -2.09275093 |
| RAB27B    | -2.09073084 |
| ASGR2     | -2.08951546 |
| FAM78B    | -2.08617787 |
| TPK1      | -2.06964817 |
| KCNH5     | -2.06767649 |
| CCDC148   | -2.06372555 |
| TRAF3IP3  | -2.0560192  |
| RAB11FIP5 | -2.05412997 |
| PPL       | -2.04210485 |
| PPEF1     | -2.04191896 |
| GRIN2B    | -2.04008312 |
| TM6SF1    | -2.03647626 |
| SPTSSB    | -2.03392426 |
| MET       | -2.03185339 |
| HSPB3     | -2.03086187 |
| MAP3K12   | -2.02995551 |
| TMEM191A  | -2.02776914 |
| HOXB3     | -2.0275512  |
| FAM20A    | -2.02594076 |
| RASSF7    | -2.02395222 |
| ADCY8     | -2.0126444  |
| FAM185A   | -2.00741713 |
| LRRC39    | -2.00586937 |
| CX3CR1    | -2.00518815 |
| DCBLD1    | -2.00410412 |
| BDKRB2    | -2.00118939 |

|          |             |
|----------|-------------|
| MARCH11  | -2.00052194 |
| NXPH2    | -1.99805764 |
| RPS29    | -1.99228617 |
| CSF2RA   | -1.98956576 |
| TMEM141  | -1.98013952 |
| STAT4    | -1.97783456 |
| ZRANB3   | -1.97349053 |
| EXOSC1   | -1.97077992 |
| CAMK2D   | -1.96893501 |
| NAPSB    | -1.96872454 |
| POLD4    | -1.96528072 |
| PCDHB2   | -1.96181663 |
| PELI3    | -1.95685049 |
| SIDT1    | -1.94582477 |
| ARHGAP26 | -1.94472913 |
| OSTF1    | -1.94464034 |
| EPHA6    | -1.93770694 |
| ARHGDIG  | -1.93619088 |
| DPYSL4   | -1.93095422 |
| SATL1    | -1.93059377 |
| NTNG1    | -1.92757207 |
| ROGDI    | -1.92653834 |
| ADCY1    | -1.92580833 |
| CBX4     | -1.92409886 |
| INO80E   | -1.92142354 |
| NIPA1    | -1.9201265  |
| ASIP     | -1.91337926 |
| WFDC2    | -1.90604248 |
| TLN2     | -1.90383831 |
| NT5DC3   | -1.90052122 |
| FAR2     | -1.90020631 |
| TRPV3    | -1.89786404 |
| NEUROD6  | -1.894338   |
| TMEM160  | -1.88957342 |
| ALKBH6   | -1.88692943 |
| SUSD3    | -1.88315649 |
| PAPSS2   | -1.88314614 |
| C11orf24 | -1.8817671  |
| COX4I2   | -1.88057265 |
| RAB15    | -1.87769944 |
| PAK1     | -1.87682644 |
| ZDHHC13  | -1.87678632 |
| ANAPC2   | -1.87128249 |

|           |             |
|-----------|-------------|
| RPH3A     | -1.87021013 |
| GTPBP10   | -1.86970167 |
| ARL15     | -1.86606592 |
| SERPINI1  | -1.86494774 |
| SPRN      | -1.85648852 |
| GLMN      | -1.8547508  |
| IP6K1     | -1.8504207  |
| SDR16C5   | -1.8496433  |
| BEND5     | -1.84923991 |
| SUSD5     | -1.84440547 |
| P2RY12    | -1.84215602 |
| ARMC7     | -1.83961509 |
| DLEU7     | -1.83900236 |
| SYCE1     | -1.83879436 |
| CDCA8     | -1.83381206 |
| OSBPL10   | -1.82763942 |
| POLR2I    | -1.82597102 |
| PPP2R2C   | -1.82394492 |
| ZBBX      | -1.82336262 |
| SCAMP5    | -1.82232731 |
| NHP2      | -1.8198052  |
| GNPAT     | -1.81953658 |
| PPP5C     | -1.81761303 |
| TLL1      | -1.81652029 |
| THRB      | -1.81253721 |
| WDR27     | -1.81157451 |
| MYO1B     | -1.81035172 |
| GTF2I     | -1.80858316 |
| KIF17     | -1.80695013 |
| PDK3      | -1.80634725 |
| NCAPH     | -1.80380763 |
| KCNB1     | -1.80189332 |
| MRPS35    | -1.79908313 |
| NAA50     | -1.79326296 |
| ZMAT5     | -1.79318808 |
| BAD       | -1.79312141 |
| SERP2     | -1.79015633 |
| KCNIP3    | -1.78871057 |
| CCDC122   | -1.78017023 |
| ME3       | -1.77957807 |
| STAP2     | -1.77643508 |
| IAH1      | -1.77292178 |
| LOC728743 | -1.77076688 |

|           |             |
|-----------|-------------|
| PANX1     | -1.7702668  |
| MYO1F     | -1.76887791 |
| C12orf10  | -1.76829405 |
| DYNLL2    | -1.76759947 |
| CCDC87    | -1.75937147 |
| MANSC1    | -1.75800472 |
| MAST1     | -1.75726859 |
| SSH2      | -1.75473085 |
| RAC3      | -1.75172203 |
| MRPL3     | -1.74811982 |
| AKTIP     | -1.74695822 |
| UQCRQ     | -1.74538468 |
| ZBTB17    | -1.74427873 |
| MTMR4     | -1.74397693 |
| VWC2L     | -1.74373237 |
| CNTNAP5   | -1.74227974 |
| PPM1J     | -1.74009158 |
| FAM98C    | -1.7369151  |
| COBLL1    | -1.73660201 |
| TTBK2     | -1.73162366 |
| PTPN3     | -1.73058237 |
| COX8A     | -1.72770805 |
| PGP       | -1.72695732 |
| ALOX5AP   | -1.72632147 |
| MYBPHL    | -1.72426531 |
| NOP16     | -1.72338711 |
| GNG13     | -1.72154644 |
| CPLX1     | -1.72119896 |
| FREM3     | -1.72076672 |
| SGTB      | -1.72010767 |
| HIST1H2BD | -1.71943975 |
| CHCHD5    | -1.71776132 |
| DPM2      | -1.71608888 |
| ETV6      | -1.71555692 |
| RHEBL1    | -1.71548615 |
| SERPINF1  | -1.71541803 |
| RASGEF1B  | -1.71477209 |
| HSPBP1    | -1.71163782 |
| OR2L3     | -1.7072141  |
| LST1      | -1.70647047 |
| RGS18     | -1.7052355  |
| ADRA1D    | -1.70493624 |
| NDUFV1    | -1.70486232 |

|          |             |
|----------|-------------|
| PRKG2    | -1.70477024 |
| USF1     | -1.69884828 |
| CTXN3    | -1.69819586 |
| GNG3     | -1.697092   |
| TRMT12   | -1.69563055 |
| NLE1     | -1.69231689 |
| GPR34    | -1.68515621 |
| DTX4     | -1.68259919 |
| RTN2     | -1.68229362 |
| TSC22D1  | -1.68100054 |
| APRT     | -1.67911682 |
| KPNA5    | -1.67266441 |
| ARL9     | -1.66804141 |
| TMEM143  | -1.6671669  |
| IL26     | -1.66598806 |
| TIMM10   | -1.66335968 |
| KCNK12   | -1.66251224 |
| CHI3L1   | -1.66138147 |
| LAPTM5   | -1.66053026 |
| NPM2     | -1.65999766 |
| RRP9     | -1.65958536 |
| RGS10    | -1.65930112 |
| FDX1L    | -1.65897028 |
| TGFBRAP1 | -1.6565792  |
| VSIG4    | -1.65553652 |
| RASAL3   | -1.65452795 |
| B3GAT1   | -1.6543154  |
| MATK     | -1.65415352 |
| BRMS1    | -1.65130787 |
| ZNF711   | -1.65101206 |
| FBXW9    | -1.65064911 |
| CNTN5    | -1.64738696 |
| ADAMTS19 | -1.64678323 |
| TAF13    | -1.64565538 |
| POPDC3   | -1.64563969 |
| ERI2     | -1.64375409 |
| SATB1    | -1.64296657 |
| GOSR1    | -1.64243595 |
| ELOVL6   | -1.63895121 |
| MFSD3    | -1.63053859 |
| MRPL36   | -1.62804909 |
| PPP3R1   | -1.62665695 |
| PRKAR1B  | -1.62576411 |

|          |             |
|----------|-------------|
| NAPB     | -1.62315006 |
| NCALD    | -1.62292034 |
| CCDC124  | -1.6223927  |
| GAB2     | -1.618717   |
| GSTZ1    | -1.61805802 |
| TAF8     | -1.61767495 |
| SORL1    | -1.61447731 |
| ACOT8    | -1.60557288 |
| FAM110A  | -1.60306185 |
| MGAT5    | -1.59932311 |
| EIF2B2   | -1.5989508  |
| CTSS     | -1.59858512 |
| UXS1     | -1.59532453 |
| TRAPPC9  | -1.59367696 |
| SMUG1    | -1.59326145 |
| XYLT1    | -1.59245677 |
| IQCJ     | -1.59218387 |
| ZCWPW2   | -1.59161589 |
| RIMS1    | -1.59068913 |
| PPFIA3   | -1.5883477  |
| MYRIP    | -1.58808524 |
| KCNV1    | -1.58709513 |
| OPN3     | -1.58244844 |
| RFC4     | -1.57829253 |
| DENND1C  | -1.57685707 |
| VPS25    | -1.57661496 |
| ZNF280A  | -1.57527544 |
| DDT      | -1.57502782 |
| HAMP     | -1.57227061 |
| HDC      | -1.57136563 |
| MRPS12   | -1.57128257 |
| TDRD7    | -1.57111983 |
| FAM69B   | -1.56706976 |
| SYT16    | -1.56644618 |
| LPAR1    | -1.56533327 |
| RTN4IP1  | -1.56446135 |
| PRSS16   | -1.56388275 |
| SLC22A18 | -1.56323917 |
| ARNTL2   | -1.56275053 |
| TSHZ2    | -1.56031057 |
| HS6ST3   | -1.56013551 |
| NUDT22   | -1.55986205 |
| UQCR11   | -1.55947587 |

|          |             |
|----------|-------------|
| HCST     | -1.55864198 |
| RPL31P11 | -1.55822408 |
| C6orf62  | -1.55566885 |
| RNF214   | -1.55385463 |
| PIN1     | -1.5533024  |
| ZNF385B  | -1.55304847 |
| NSMCE2   | -1.55239157 |
| RPS27    | -1.55130831 |
| PIK3AP1  | -1.55060517 |
| PLCXD1   | -1.54957711 |
| PTPN4    | -1.54924003 |
| RPL36    | -1.54833418 |
| RAB3D    | -1.5474649  |
| FAM173A  | -1.54713725 |
| APP      | -1.54562385 |
| KCNH1    | -1.54261929 |
| NR2C2    | -1.54251821 |
| MPG      | -1.54190129 |
| PTPN21   | -1.54156676 |
| NUBP1    | -1.53755284 |
| ADAMTS5  | -1.53643754 |
| LY6G5B   | -1.53327783 |
| CBX3     | -1.53326595 |
| L3MBTL3  | -1.5320461  |
| XRCC4    | -1.53032882 |
| COX7B    | -1.52884761 |
| TEKT5    | -1.52819071 |
| TRMT61B  | -1.52727235 |
| EML1     | -1.5255224  |
| PPM1M    | -1.5225343  |
| AIF1     | -1.52190571 |
| DGKI     | -1.52171939 |
| MIEN1    | -1.51932517 |
| NDUFA1   | -1.51896616 |
| MAPK1    | -1.51781909 |
| SPHK2    | -1.51766326 |
| EXOSC5   | -1.51561354 |
| NAPEPLD  | -1.51504626 |
| OLR1     | -1.51467765 |
| TTLL7    | -1.5143643  |
| ZNF182   | -1.51367542 |
| ZNF668   | -1.51304092 |
| ATG12    | -1.51101757 |

|           |             |
|-----------|-------------|
| CCDC39    | -1.51031055 |
| GPR108    | -1.50891131 |
| HINT3     | -1.50770685 |
| CPNE7     | -1.50563966 |
| CCDC151   | -1.50528408 |
| CCM2      | -1.50434504 |
| GFM1      | -1.50379199 |
| ELAVL4    | -1.50306129 |
| MOCS3     | -1.50297751 |
| ABHD5     | -1.50208074 |
| RELL2     | -1.50177789 |
| ARG2      | -1.50135024 |
| C11orf80  | -1.50052664 |
| MIPEP     | -1.49928735 |
| WDR55     | -1.49915792 |
| FBXL15    | -1.49853594 |
| C12orf54  | -1.49835894 |
| MED13     | -1.49605199 |
| EXOSC4    | -1.49389461 |
| NDUFA13   | -1.4929828  |
| HGD       | -1.49225733 |
| TMEM232   | -1.4903588  |
| ZNF471    | -1.49010867 |
| PID1      | -1.48894955 |
| TNFRSF11A | -1.48844617 |
| NANOS3    | -1.48733502 |
| CCDC107   | -1.48711317 |
| PITPNM1   | -1.48672944 |
| MRPL55    | -1.48598653 |
| FAT3      | -1.4850951  |
| MPV17     | -1.48488031 |
| CKMT1A    | -1.48436158 |
| RHOT1     | -1.48421283 |
| PMS2P1    | -1.48288297 |
| C12orf4   | -1.47912225 |
| ATP6V1G2  | -1.47859018 |
| STRBP     | -1.47633993 |
| DUSP4     | -1.47572005 |
| TMEM11    | -1.47491739 |
| MARCH2    | -1.4747343  |
| C19orf70  | -1.47459956 |
| ACTN4     | -1.47300323 |
| N6AMT1    | -1.47289306 |



|                |             |
|----------------|-------------|
| CD3EAP         | -1.47205726 |
| RPA3           | -1.46986915 |
| MPP6           | -1.4690783  |
| NT5DC2         | -1.4688075  |
| LAIR1          | -1.46074046 |
| CDH8           | -1.46050438 |
| MRPL18         | -1.46023479 |
| MPND           | -1.45864129 |
| DDX49          | -1.45717424 |
| NICN1          | -1.45586049 |
| DNAJA2         | -1.45550315 |
| SMYD5          | -1.45548098 |
| SLC25A10       | -1.45509475 |
| DTWD2          | -1.45377742 |
| TBC1D30        | -1.45374954 |
| ZFYVE9         | -1.45308043 |
| SNX10          | -1.45169163 |
| SLC25A46       | -1.45133744 |
| DDX41          | -1.44980387 |
| REXO4          | -1.44961438 |
| TFPT           | -1.4490748  |
| RGS7           | -1.44856472 |
| ST6GALNA<br>C5 | -1.44813898 |
| GLIS1          | -1.4463153  |
| FRMD5          | -1.44371675 |
| GAS5           | -1.44304614 |
| WDR83OS        | -1.44234287 |
| APBA1          | -1.44143248 |
| HIST1H4K       | -1.44116945 |
| TMEM68         | -1.43951031 |
| ZSCAN23        | -1.43847777 |
| FAM89B         | -1.43781374 |
| CD53           | -1.43748265 |
| SULT4A1        | -1.43613346 |
| SNRPE          | -1.43580408 |
| TLR6           | -1.43553881 |
| EPHA3          | -1.43539492 |
| TPST2          | -1.43535645 |
| STX1A          | -1.43523273 |
| TMOD2          | -1.43342664 |
| GPR183         | -1.43252823 |
| CA10           | -1.43221134 |

|           |             |
|-----------|-------------|
| OXR1      | -1.4308572  |
| PTGES2    | -1.43072907 |
| FIG4      | -1.43068268 |
| DIS3L     | -1.429308   |
| GGH       | -1.42899879 |
| RANBP10   | -1.4289654  |
| PDZD4     | -1.42851117 |
| RPL23AP82 | -1.42776879 |
| ZNF780B   | -1.42747627 |
| C3        | -1.42711816 |
| APBB1IP   | -1.4269186  |
| KATNB1    | -1.42687961 |
| SLC35A4   | -1.42369452 |
| VASH1     | -1.42266904 |
| LOC731157 | -1.42229135 |
| ANAPC1    | -1.42188501 |
| RPE       | -1.42188402 |
| GNB1      | -1.42154617 |
| SAMHD1    | -1.41750906 |
| ALKBH7    | -1.41625681 |
| C19orf47  | -1.41607586 |
| MAP2K2    | -1.41471505 |
| CDC6      | -1.41462192 |
| AAK1      | -1.41410543 |
| GRM5      | -1.4139411  |
| GDF10     | -1.41370265 |
| RNF170    | -1.41228334 |
| ELK4      | -1.41049183 |
| ITGA2B    | -1.41002511 |
| MCM7      | -1.40946415 |
| POLR2E    | -1.40918422 |
| NUDT6     | -1.40871784 |
| LMBRD2    | -1.4084675  |
| BTBD6     | -1.40746342 |
| ARL6      | -1.40550572 |
| DUSP3     | -1.40455813 |
| KCNB2     | -1.40455139 |
| MRPL21    | -1.40450605 |
| PHLDA3    | -1.40413036 |
| NDUFB7    | -1.40342138 |
| FGL2      | -1.40243685 |
| MAP2K6    | -1.40234515 |
| KHDRBS2   | -1.4010049  |

|                |             |
|----------------|-------------|
| TRMU           | -1.40083603 |
| GRIN2A         | -1.39955197 |
| ILVBL          | -1.39919181 |
| NEDD8          | -1.39852502 |
| BARD1          | -1.39837608 |
| RANBP9         | -1.39830352 |
| LARP4B         | -1.39699891 |
| RNF220         | -1.39675847 |
| FKBP3          | -1.39663574 |
| HRASLS         | -1.39611847 |
| TTC23L         | -1.39605044 |
| NDUFV3         | -1.39465396 |
| COPE           | -1.39447713 |
| USP12          | -1.39435047 |
| VPS4A          | -1.39330752 |
| S100Z          | -1.39319066 |
| MAP4K2         | -1.39295858 |
| NKAIN2         | -1.39295423 |
| NTHL1          | -1.39235319 |
| GMPPB          | -1.39042419 |
| HECW2          | -1.38985114 |
| TRPM4          | -1.3891795  |
| SLC44A5        | -1.38833604 |
| RAD9A          | -1.38819692 |
| COASY          | -1.38754509 |
| HIST1H4J       | -1.38734865 |
| VCPIP1         | -1.38641521 |
| FIBP           | -1.38630053 |
| HDAC5          | -1.38547611 |
| TRNP1          | -1.38486767 |
| DUSP2          | -1.38430425 |
| VMO1           | -1.38407761 |
| CALM3          | -1.38323437 |
| DUSP6          | -1.38228081 |
| FCGR2A         | -1.38098453 |
| S100A8         | -1.38076644 |
| SSNA1          | -1.37931261 |
| EHBP1L1        | -1.37900531 |
| CATSPER2P<br>1 | -1.3788177  |
| DCXR           | -1.37715011 |
| SLC38A6        | -1.37690977 |
| RPF2           | -1.3748986  |

|          |             |
|----------|-------------|
| PRDX5    | -1.37395876 |
| ALKBH2   | -1.37394421 |
| ADAM9    | -1.3722963  |
| C1orf162 | -1.37199545 |
| PTPRT    | -1.37181549 |
| GABRA3   | -1.37098084 |
| CLEC2L   | -1.37063986 |
| RPL10    | -1.36988081 |
| TNFSF13B | -1.36774365 |
| CEP152   | -1.36769686 |
| TSHZ3    | -1.36746462 |
| TMSB10   | -1.36725239 |
| MCHR2    | -1.36697644 |
| PARP6    | -1.3668965  |
| NOP14    | -1.36570628 |
| HOMER2   | -1.36491208 |
| CHRNA2   | -1.36416593 |
| CYP46A1  | -1.36357897 |
| SEMA7A   | -1.36325439 |
| THAP7    | -1.3607321  |
| TTL      | -1.36036444 |
| ZNF592   | -1.35995758 |
| VIPR2    | -1.35952712 |
| YTHDF3   | -1.35913548 |
| TFEC     | -1.35875761 |
| WDR13    | -1.35653323 |
| MYO19    | -1.35529518 |
| RHCE     | -1.35504648 |
| FBXW5    | -1.35438585 |
| ABHD8    | -1.3521005  |
| ZNF517   | -1.3519152  |
| SLC25A16 | -1.3509842  |
| RASGRF2  | -1.34837451 |
| HK2      | -1.34646657 |
| ANKRD52  | -1.34604879 |
| ZNHIT3   | -1.34538715 |
| KCNJ9    | -1.34499118 |
| MAL2     | -1.34350877 |
| B4GALT7  | -1.34264858 |
| PET100   | -1.34101818 |
| TMEM132C | -1.33855094 |
| XPO7     | -1.33828213 |
| ST3GAL3  | -1.33686377 |

|           |             |
|-----------|-------------|
| FMN1      | -1.33675613 |
| GDA       | -1.33637638 |
| ADAM23    | -1.33626413 |
| CBWD1     | -1.33618044 |
| FLOT1     | -1.33533631 |
| CNTNAP2   | -1.33524344 |
| VPS37D    | -1.33377979 |
| HLA-DMB   | -1.33370309 |
| ZNF526    | -1.33333045 |
| RASSF5    | -1.33168863 |
| VPS37A    | -1.33161097 |
| MRPL14    | -1.33147444 |
| SUPT3H    | -1.33034605 |
| NNT       | -1.32941331 |
| ANKRD9    | -1.32934135 |
| TPI1P2    | -1.32804678 |
| RNF26     | -1.32789188 |
| SERINC5   | -1.32693837 |
| L3MBTL4   | -1.32607482 |
| GSS       | -1.32483677 |
| EZH2      | -1.32378803 |
| SPHKAP    | -1.32372012 |
| VMAC      | -1.32294756 |
| RNF14     | -1.32234346 |
| MAP3K9    | -1.32222927 |
| BTBD8     | -1.32158503 |
| AMIGO1    | -1.32154472 |
| IGFBP2    | -1.32039731 |
| ZNF492    | -1.32013462 |
| HNRNPH2   | -1.3194771  |
| CYTH2     | -1.31857304 |
| ANKRD13C  | -1.31800162 |
| TYRP1     | -1.31763695 |
| ITGB3BP   | -1.31675017 |
| PLXNA1    | -1.31545242 |
| ANKRD13D  | -1.3139857  |
| EVI2B     | -1.31273828 |
| TTY15     | -1.31172751 |
| UQCRHL    | -1.31125617 |
| GUCY1A2   | -1.30936106 |
| CCDC144NL | -1.30904331 |
| CLUL1     | -1.30785949 |
| ANK2      | -1.30577473 |

|          |             |
|----------|-------------|
| PTPRS    | -1.30492288 |
| GNAQ     | -1.30465128 |
| DCTN2    | -1.30370319 |
| AIP      | -1.30288319 |
| PEX16    | -1.3026195  |
| ACCS     | -1.30233995 |
| MRPL45   | -1.30212992 |
| MCRS1    | -1.30157791 |
| RPS15A   | -1.29950797 |
| SLC4A8   | -1.29939188 |
| RASGRP1  | -1.29802577 |
| LRFN5    | -1.29677099 |
| RPS12    | -1.29670227 |
| HIST1H1A | -1.2966862  |
| ECSIT    | -1.29468745 |
| ZNF415   | -1.29435717 |
| SAMD12   | -1.29312707 |
| LIN7B    | -1.29147296 |
| TOMM5    | -1.29143706 |
| TUBA4B   | -1.2884079  |
| SPATS2   | -1.28823816 |
| ATG7     | -1.28738065 |
| PSMD13   | -1.28664882 |
| HLA-DRA  | -1.2863059  |
| ZNF740   | -1.28504969 |
| IFI30    | -1.28438183 |
| HARS     | -1.28413663 |
| TPD52    | -1.28364275 |
| L2HGDH   | -1.2829018  |
| PDCL3    | -1.282151   |
| CD74     | -1.28197275 |
| PIN4     | -1.28137354 |
| CSAD     | -1.28077439 |
| ASGR1    | -1.28034047 |
| WDR86    | -1.28000263 |

**Table 3 Top 10% genes positively associated with cortical mean diffusivity**

| <b>Gene</b> | <b>T</b>   |
|-------------|------------|
| MYH11       | 5.12758892 |
| TMEM215     | 4.68741316 |
| PECAM1      | 4.41648166 |
| ACTG2       | 4.08416666 |
| NXN         | 4.0341803  |
| TAGLN       | 4.02089969 |
| FMO2        | 4.01248038 |
| HSPA1A      | 4.00106707 |
| TPM2        | 3.99674603 |
| DACT1       | 3.94604664 |
| S100A4      | 3.93058643 |
| CHRNA6      | 3.92851395 |
| RELN        | 3.88172712 |
| HSPB1       | 3.79896172 |
| SUSD2       | 3.77971486 |
| COL1A2      | 3.7498961  |
| CNN2        | 3.71668479 |
| AEBP1       | 3.60662833 |
| PDGFD       | 3.57324785 |
| REC8        | 3.55656092 |
| HIST1H1D    | 3.53935961 |
| ITGA7       | 3.515037   |
| FAM129A     | 3.49063133 |
| MXRA8       | 3.47878559 |
| NUPR1       | 3.46994599 |
| EPCAM       | 3.37719409 |
| SERPINH1    | 3.31547044 |
| MYL9        | 3.26755235 |
| HSD11B1     | 3.25884554 |
| FLNA        | 3.20979134 |
| PLN         | 3.20433891 |
| SLITRK6     | 3.20059801 |
| DNMT3B      | 3.15088819 |
| ACTA2       | 3.14014535 |
| SLC2A12     | 3.12535372 |
| GLI1        | 3.12524908 |
| HMGN3       | 3.1094747  |
| PGAM2       | 3.09160056 |
| PTCH1       | 3.0711803  |
| CXCL2       | 3.06969929 |
| CRIP1       | 3.04748016 |

|           |            |
|-----------|------------|
| PHKA2     | 3.03207495 |
| SCN7A     | 3.02086388 |
| CD44      | 2.99793781 |
| CD55      | 2.95154979 |
| LMAN2L    | 2.95055276 |
| APLNR     | 2.95041436 |
| SRGAP1    | 2.91972214 |
| PBX4      | 2.90999714 |
| BTG3      | 2.90709745 |
| OLFML2A   | 2.90671971 |
| IGF2BP2   | 2.89351374 |
| CLCA4     | 2.88942107 |
| TOB1      | 2.88490586 |
| MATN2     | 2.84831195 |
| ACO1      | 2.84477082 |
| ANTXR2    | 2.83418584 |
| SPARC     | 2.81317311 |
| PLXNB3    | 2.81004269 |
| IQGAP1    | 2.80680644 |
| RGS9      | 2.8055659  |
| KRTAP12-1 | 2.79236935 |
| MYH15     | 2.78641133 |
| ABHD1     | 2.78521365 |
| TRPC4     | 2.77764663 |
| NFE2L3    | 2.77249738 |
| RCN3      | 2.76977722 |
| ANGPT1    | 2.75349288 |
| AVIL      | 2.74470122 |
| NPNT      | 2.74252132 |
| ENOSF1    | 2.72951565 |
| ITGB4     | 2.71818492 |
| MGAT4C    | 2.71792571 |
| DNAJB1    | 2.71700562 |
| MMP14     | 2.71249211 |
| PIRT      | 2.70941453 |
| CLEC18B   | 2.69843631 |
| TBC1D26   | 2.67639985 |
| CDH23     | 2.6577128  |
| TEKT2     | 2.65748251 |
| CTGF      | 2.65369112 |
| FOXO1     | 2.65342167 |
| LYPD1     | 2.64662039 |
| TBL1X     | 2.64655904 |



|           |            |
|-----------|------------|
| LIPC      | 2.63696294 |
| RGS8      | 2.63403996 |
| SLCO2A1   | 2.62808752 |
| CMKLR1    | 2.626923   |
| FANCL     | 2.62545341 |
| MPST      | 2.60767448 |
| GBP2      | 2.60742682 |
| RSPH9     | 2.59235863 |
| PON3      | 2.5864104  |
| CYP2J2    | 2.5846482  |
| DGKG      | 2.57488014 |
| KLF4      | 2.57434751 |
| ACTL6A    | 2.56577998 |
| EGR4      | 2.56391186 |
| ATF3      | 2.56105598 |
| ALDH3B1   | 2.55860187 |
| VWF       | 2.55232767 |
| C11orf96  | 2.54957592 |
| LOC554206 | 2.53661845 |
| PDE5A     | 2.53475915 |
| COL16A1   | 2.53021705 |
| PDLIM4    | 2.50687883 |
| HTRA3     | 2.50623596 |
| TBC1D10C  | 2.50200452 |
| RFX4      | 2.4940321  |
| TCAP      | 2.48495149 |
| PELI2     | 2.47903264 |
| FOS       | 2.4764316  |
| ANKRD45   | 2.46244616 |
| PCDHGB4   | 2.4594932  |
| FAM71F1   | 2.45042863 |
| CAV1      | 2.44843359 |
| FAM196A   | 2.44554284 |
| ARSE      | 2.44510979 |
| CCL19     | 2.44391566 |
| C1QTNF6   | 2.44122275 |
| CCDC154   | 2.43556593 |
| MT1F      | 2.42888131 |
| CXCR4     | 2.42607502 |
| DLEC1     | 2.41435055 |
| CCDC152   | 2.41196732 |
| PEG10     | 2.40993231 |
| B3GAT2    | 2.40954078 |

|          |            |
|----------|------------|
| CDH2     | 2.396584   |
| TMEM39A  | 2.39288893 |
| NEXN     | 2.38992232 |
| IL15     | 2.38866497 |
| NINL     | 2.38740081 |
| VANGL2   | 2.38214297 |
| PPP2R1B  | 2.37204962 |
| ADAMTS1  | 2.36959817 |
| SP1      | 2.36813181 |
| TP53INP1 | 2.36412902 |
| SGSH     | 2.36029885 |
| ZNF735   | 2.35640972 |
| COL4A1   | 2.35403436 |
| MICALL1  | 2.3510238  |
| YY2      | 2.34734225 |
| NDUFS7   | 2.34316978 |
| LXN      | 2.3430193  |
| TNRC6C   | 2.34197088 |
| CPAMD8   | 2.33496891 |
| AASS     | 2.33096442 |
| TIMP3    | 2.32410092 |
| ZNRF3    | 2.31959789 |
| ADAM15   | 2.30446081 |
| SSBP2    | 2.30293845 |
| ASB2     | 2.30126938 |
| GRPR     | 2.30058344 |
| OAS3     | 2.29637425 |
| CDK4     | 2.29265865 |
| SREBF1   | 2.29226628 |
| PYGO1    | 2.29050874 |
| EMP3     | 2.28935091 |
| SLC4A11  | 2.28443944 |
| ZNF774   | 2.28040455 |
| DOCK6    | 2.27542592 |
| ITGA8    | 2.27220021 |
| SLC7A2   | 2.27053094 |
| FIBIN    | 2.26862204 |
| CALCRL   | 2.26675545 |
| EMP1     | 2.26224348 |
| PTTG1IP  | 2.26120133 |
| PIGA     | 2.2570553  |
| HSD3B7   | 2.25319445 |
| STK33    | 2.24740741 |

|           |            |
|-----------|------------|
| HLA-G     | 2.24404963 |
| CXorf57   | 2.24257146 |
| SPRYD4    | 2.24022351 |
| DNA2      | 2.23918431 |
| GLUD1     | 2.22973387 |
| PLBD1     | 2.22523853 |
| PABPC1L   | 2.2210071  |
| CFB       | 2.2189998  |
| DOK1      | 2.21299293 |
| LAMB2     | 2.20785302 |
| SLC30A1   | 2.19820485 |
| LOC390705 | 2.19521767 |
| HEY2      | 2.19122286 |
| FLNC      | 2.1861167  |
| PCDHGA3   | 2.18359149 |
| SLC22A5   | 2.18204537 |
| IDUA      | 2.17912135 |
| LRIG3     | 2.17777961 |
| TMEM209   | 2.17727655 |
| CALD1     | 2.17674845 |
| TMEM170A  | 2.16863682 |
| PLXNB2    | 2.16759354 |
| TJP2      | 2.16451862 |
| SEMA5B    | 2.15992273 |
| NPC2      | 2.15858509 |
| DDR2      | 2.15584501 |
| DDX31     | 2.15330098 |
| CNR1      | 2.14934286 |
| PI16      | 2.14659334 |
| WWTR1     | 2.14528005 |
| PDE3A     | 2.14492851 |
| DNAH12    | 2.14366167 |
| EDNRB     | 2.13746868 |
| TIMP2     | 2.13712185 |
| ARHGAP18  | 2.13403841 |
| KRTCAP3   | 2.12933932 |
| SLC9A9    | 2.12906664 |
| CYP7B1    | 2.11997683 |
| SF3B4     | 2.11881495 |
| PAFAH1B3  | 2.11322086 |
| IFI44     | 2.1127917  |
| LRP2      | 2.10924392 |
| BTNL9     | 2.10829621 |

|           |            |
|-----------|------------|
| TXNRD1    | 2.1066461  |
| RELL1     | 2.10182283 |
| COL7A1    | 2.10137269 |
| VWCE      | 2.09810301 |
| HIST1H2AG | 2.0974765  |
| GRP       | 2.09141679 |
| SLC13A5   | 2.0908053  |
| DYNLT1    | 2.08316053 |
| ERAP1     | 2.07992778 |
| CARD6     | 2.07670641 |
| AP1G2     | 2.07209082 |
| CC2D2A    | 2.06902449 |
| FHL5      | 2.06889578 |
| THSD4     | 2.06790396 |
| CASC2     | 2.06476458 |
| UGT8      | 2.0641354  |
| RERG      | 2.06321093 |
| INTU      | 2.06247488 |
| C12orf60  | 2.06242305 |
| FMO5      | 2.06183366 |
| PRR14     | 2.05884491 |
| CHRAC1    | 2.05882268 |
| HSD17B3   | 2.05582558 |
| MCHR1     | 2.05505344 |
| MICALL2   | 2.05201546 |
| LRRC1     | 2.04718923 |
| TP53RK    | 2.04530515 |
| JAG1      | 2.04522006 |
| PTGDS     | 2.04344313 |
| PEX12     | 2.04196138 |
| C10orf105 | 2.03881108 |
| TTPA      | 2.03746752 |
| ARHGAP10  | 2.02901491 |
| TRIM45    | 2.01700202 |
| STEAP3    | 2.01601331 |
| CLTCL1    | 2.01530211 |
| CARD8     | 2.00961402 |
| ACACB     | 2.00437784 |
| SLC27A6   | 2.00300274 |
| TRPS1     | 2.00095766 |
| LRFN2     | 1.99605784 |
| TBX2      | 1.99563218 |
| PLVAP     | 1.99520238 |

|           |            |
|-----------|------------|
| COL18A1   | 1.99416087 |
| FOXC1     | 1.99229339 |
| IQCD      | 1.99143674 |
| SLC39A12  | 1.98912489 |
| ABCA1     | 1.9861727  |
| BNIP2     | 1.98373186 |
| ELOVL5    | 1.98346462 |
| APH1B     | 1.9828066  |
| MYOM1     | 1.9822725  |
| TMPRSS5   | 1.9820127  |
| ISG20     | 1.97797471 |
| ELL3      | 1.9740502  |
| CXADRP3   | 1.97402146 |
| ZNF835    | 1.97095604 |
| TIMP1     | 1.97080201 |
| ITGA1     | 1.97014826 |
| GPR62     | 1.96801127 |
| HIST1H2AH | 1.96724659 |
| KCNJ6     | 1.96555557 |
| LOC400684 | 1.96156366 |
| LDB3      | 1.9559535  |
| PARD3B    | 1.95267916 |
| ALCAM     | 1.9488516  |
| H2AFJ     | 1.94704726 |
| TMEM38B   | 1.94179798 |
| PLD5      | 1.94068108 |
| SEC61A1   | 1.93438392 |
| PCDH18    | 1.92941392 |
| TAS2R30   | 1.92652222 |
| PLEKHG2   | 1.92415672 |
| GPR83     | 1.92349695 |
| SMURF2    | 1.92310378 |
| C8orf58   | 1.92273459 |
| PLAC8L1   | 1.92184232 |
| TAGLN2    | 1.92093066 |
| IGF2BP3   | 1.91558533 |
| STT3A     | 1.91469413 |
| FAM111A   | 1.9141154  |
| ANG       | 1.91145999 |
| DLL1      | 1.90638782 |
| FKBP5     | 1.90629177 |
| FREM1     | 1.90543697 |
| PPP2R3B   | 1.89999382 |

|           |            |
|-----------|------------|
| CHRNA3    | 1.89812313 |
| PLTP      | 1.89612465 |
| ZCCHC3    | 1.89501787 |
| POLH      | 1.89466954 |
| CHST14    | 1.89457693 |
| MORC4     | 1.89393999 |
| ZC3H4     | 1.89150249 |
| COL4A2    | 1.89144479 |
| PLEKHH2   | 1.88810393 |
| FN1       | 1.88779562 |
| HEG1      | 1.88484207 |
| TRRAP     | 1.88458581 |
| CFD       | 1.88218566 |
| ADCY4     | 1.8815612  |
| MALL      | 1.88106371 |
| PLEKHA7   | 1.87940241 |
| SEMA3C    | 1.87816744 |
| S100A6    | 1.87250317 |
| XKR8      | 1.87023664 |
| LRIG1     | 1.86803956 |
| HIST1H2AD | 1.86303758 |
| ACCS      | 1.86301292 |
| DYRK3     | 1.8614566  |
| HIST1H2AK | 1.86116118 |
| TTLL4     | 1.85678737 |
| PALMD     | 1.85581896 |
| FOXF2     | 1.8547792  |
| NPFF      | 1.85076952 |
| FADS1     | 1.85067393 |
| C11orf71  | 1.84756118 |
| MST1      | 1.84545912 |
| CD163     | 1.84177618 |
| DSCAML1   | 1.84142531 |
| GEM       | 1.83959436 |
| PLP2      | 1.83959104 |
| LOXL3     | 1.83854463 |
| HHIP      | 1.83767201 |
| TJAP1     | 1.83729437 |
| SMAD5     | 1.83660396 |
| C1orf56   | 1.8345601  |
| ZCCHC12   | 1.83441622 |
| EML3      | 1.83322012 |
| FUK       | 1.8298916  |

|        |            |
|--------|------------|
| PLSCR4 | 1.82915112 |
| ISOC1  | 1.8263964  |
| KDM5B  | 1.82138127 |
| EHD2   | 1.82110379 |
| LIFR   | 1.81876383 |

**Table 4 Top 10% genes negatively associated with cortical mean diffusivity**

| <b>Gene</b> | <b>T</b>   |
|-------------|------------|
| ZBBX        | -5.8655597 |
| COL10A1     | -4.9772037 |
| RPH3A       | -4.7870584 |
| LRRC20      | -4.7790418 |
| GALNTL5     | -4.7187389 |
| SERPINF1    | -4.6996848 |
| PDK3        | -4.6960537 |
| KCNIP3      | -4.5922382 |
| RP9P        | -4.4839389 |
| PHLDA2      | -4.398832  |
| BEND5       | -4.382623  |
| CDT1        | -4.2447609 |
| TM6SF1      | -4.1233527 |
| LPL         | -4.1044895 |
| NOS2        | -4.0990248 |
| PINK1       | -4.0962372 |
| KRTAP19-8   | -4.0900589 |
| XKR9        | -4.0876736 |
| SPHK2       | -4.0811417 |
| NEFL        | -4.0787576 |
| LYRM4       | -4.0755687 |
| FAM162B     | -4.0746256 |
| SLAMF7      | -4.0468249 |
| KIF17       | -4.0418209 |
| COPS7A      | -4.0396666 |
| MAPK10      | -3.9996099 |
| DCAF8L2     | -3.9879531 |
| GHITM       | -3.9830406 |
| DUSP3       | -3.9422763 |
| KLHDC3      | -3.9289819 |
| IPCEF1      | -3.9253214 |
| CD79A       | -3.8688458 |
| CALM2       | -3.8596883 |
| MGLL        | -3.8583534 |
| AMN1        | -3.8511895 |
| CRYBB2P1    | -3.8455618 |
| ALX3        | -3.8407556 |
| C3orf18     | -3.839471  |
| STRBP       | -3.8372414 |
| OR5L2       | -3.8306    |
| GNG3        | -3.8194455 |



|           |            |
|-----------|------------|
| RHEB      | -3.8166614 |
| HOXB13    | -3.8090339 |
| CDH8      | -3.8077859 |
| HLA-DRB3  | -3.7947233 |
| UBE2QL1   | -3.7939761 |
| FDX1L     | -3.7763963 |
| HAMP      | -3.7709883 |
| RIMS1     | -3.7429875 |
| SURF2     | -3.7321876 |
| LRRK1     | -3.727944  |
| ANKRD42   | -3.7248841 |
| HRASLS    | -3.7232395 |
| BCORP1    | -3.7226912 |
| SLC22A7   | -3.713603  |
| NRN1      | -3.7001958 |
| C3orf14   | -3.6949514 |
| IRX5      | -3.6865178 |
| ATXN7L3   | -3.6786286 |
| DHRS7B    | -3.6774447 |
| FRAT2     | -3.6730785 |
| PLXDC1    | -3.6727155 |
| UBE2D4    | -3.6683898 |
| BID       | -3.6628081 |
| SLC2A5    | -3.6580734 |
| GPATCH4   | -3.6564407 |
| ATF4      | -3.6557671 |
| TUSC2     | -3.6550299 |
| TREM2     | -3.6544525 |
| OCIAD2    | -3.6427161 |
| DNAJC19   | -3.6274626 |
| DBNDD1    | -3.6240873 |
| C14orf177 | -3.6071964 |
| SPEF1     | -3.5990108 |
| COL24A1   | -3.5910885 |
| SNRNP25   | -3.5883887 |
| CLEC4M    | -3.5845657 |
| SPATS2    | -3.5835463 |
| STAMBPL1  | -3.5794437 |
| CLEC2L    | -3.5703084 |
| SAMD14    | -3.5703021 |
| TAGLN3    | -3.5676901 |
| OPA3      | -3.5650386 |
| UCHL3     | -3.5625757 |

|            |            |
|------------|------------|
| SMPX       | -3.561534  |
| MED10      | -3.5610282 |
| ABCC12     | -3.5593704 |
| TMEM232    | -3.554067  |
| NCKAP1     | -3.5490832 |
| ST8SIA5    | -3.5477037 |
| YIPF1      | -3.5360179 |
| GPR179     | -3.5350107 |
| UROS       | -3.5298639 |
| ZNF385B    | -3.5296996 |
| CAPS2      | -3.5277346 |
| DTX4       | -3.522191  |
| PSMG3      | -3.5219828 |
| RB1CC1     | -3.5196222 |
| PPP1R11    | -3.5173623 |
| POP4       | -3.5121318 |
| PPM1H      | -3.5120143 |
| OAT        | -3.5094982 |
| WNT10A     | -3.5076684 |
| POPDC3     | -3.5045966 |
| UST        | -3.5000296 |
| ITGB1BP1   | -3.4991998 |
| MYBPHL     | -3.4930255 |
| HLA-DRA    | -3.4922798 |
| C1orf216   | -3.4881014 |
| UGP2       | -3.4865481 |
| FBXO9      | -3.4828873 |
| SNX32      | -3.4816723 |
| IGFBP6     | -3.4762212 |
| NARS       | -3.4748032 |
| GLMN       | -3.4733283 |
| SDCCAG8    | -3.4728704 |
| GMPR2      | -3.4630842 |
| MICAL2     | -3.4614736 |
| C6orf106   | -3.4591499 |
| CA10       | -3.4551213 |
| RANBP9     | -3.4507457 |
| THOC7      | -3.4460957 |
| LOC1001267 |            |
| 84         | -3.4457085 |
| ALOX5      | -3.4444367 |
| RNF168     | -3.4432099 |
| COL5A2     | -3.4426424 |

|          |            |
|----------|------------|
| TIMM17A  | -3.4392889 |
| LRRC6    | -3.438557  |
| TRNP1    | -3.4375234 |
| C3AR1    | -3.4325996 |
| PDCL3    | -3.4299873 |
| ZNF720   | -3.4275251 |
| VTI1B    | -3.4213828 |
| STAU2    | -3.4201617 |
| HMGCS2   | -3.4196324 |
| ATP6V1E2 | -3.4123917 |
| SYCP2L   | -3.4074836 |
| KAZALD1  | -3.4070478 |
| NDUFB9   | -3.4059315 |
| RNF214   | -3.4001738 |
| CYP2E1   | -3.3994706 |
| SAE1     | -3.3939098 |
| TOMM5    | -3.3810352 |
| RASL10B  | -3.3770124 |
| FAM182B  | -3.3763827 |
| HSD11B1L | -3.3713955 |
| RPA4     | -3.3695793 |
| POLE4    | -3.3623392 |
| ARMCX3   | -3.3616474 |
| ITPK1    | -3.35991   |
| SLC35C1  | -3.3544148 |
| SHC3     | -3.3534697 |
| CTSS     | -3.3506701 |
| TTR      | -3.3466778 |
| NHLRC4   | -3.3435683 |
| PSMC3    | -3.3401919 |
| LRRC39   | -3.3340243 |
| POLD4    | -3.3293712 |
| TOX      | -3.3291598 |
| SH2D2A   | -3.3230876 |
| SNN      | -3.3217836 |
| ST6GAL1  | -3.3216006 |
| KIAA1549 | -3.3182591 |
| HLA-DMB  | -3.3172422 |
| FNDC4    | -3.3134679 |
| TRIM15   | -3.3080936 |
| PPP1R14C | -3.3062254 |
| SLC6A12  | -3.299078  |
| COX7A2   | -3.2915336 |

|          |            |
|----------|------------|
| NEFM     | -3.2909491 |
| BECN1    | -3.2885907 |
| KCNQ5    | -3.2881012 |
| BCL2L2   | -3.2872428 |
| RPS19BP1 | -3.2864578 |
| OLFM1    | -3.2836959 |
| ZNF143   | -3.2812519 |
| COL12A1  | -3.2799833 |
| PARD6A   | -3.2740508 |
| CIAPIN1  | -3.274019  |
| PLEKHM2  | -3.2738832 |
| ITGB2    | -3.2730424 |
| RGS4     | -3.271795  |
| NEFH     | -3.271033  |
| HEXIM1   | -3.2699336 |
| ADRA1D   | -3.2669017 |
| VPS41    | -3.2667559 |
| POP7     | -3.2646088 |
| CARS     | -3.2641428 |
| CCM2     | -3.2587769 |
| KIF5A    | -3.2553056 |
| ITGB3BP  | -3.2523105 |
| SNTG1    | -3.2500039 |
| ECT2     | -3.2472209 |
| CACNG6   | -3.2471107 |
| KCNQ3    | -3.2470006 |
| QPCT     | -3.2437864 |
| UNC13A   | -3.2389445 |
| GLRX5    | -3.2371396 |
| ZNF814   | -3.2364872 |
| CCDC25   | -3.2308117 |
| GPR158   | -3.2248055 |
| COQ10B   | -3.2224284 |
| BOLA3    | -3.221223  |
| AMACR    | -3.2183421 |
| PHYH     | -3.2162932 |
| RIMKLA   | -3.2160119 |
| PITRM1   | -3.2133559 |
| AVEN     | -3.2052583 |
| ZBTB8OS  | -3.2024552 |
| LCE3C    | -3.2004237 |
| UBL4A    | -3.1976092 |
| ZSWIM7   | -3.1961201 |

|           |            |
|-----------|------------|
| ZNF622    | -3.1939562 |
| NOMO1     | -3.193099  |
| PEF1      | -3.1921605 |
| PIN1      | -3.1899783 |
| CCNDBP1   | -3.1875522 |
| CNTNAP2   | -3.1865165 |
| NUDT15    | -3.1862165 |
| PTPRT     | -3.1822965 |
| ZBTB22    | -3.1809087 |
| DENR      | -3.1786046 |
| TNFAIP1   | -3.1780485 |
| PMPCB     | -3.1765259 |
| PAK1      | -3.1745147 |
| LSM10     | -3.1742813 |
| WDR37     | -3.1704636 |
| C12orf10  | -3.1660301 |
| SLC25A5   | -3.1648261 |
| INSM2     | -3.1645503 |
| TPI1      | -3.164391  |
| NDUFB8    | -3.1602704 |
| LINC00319 | -3.1594763 |
| METTL13   | -3.1583513 |
| NAALADL2  | -3.1549221 |
| NDUFB3    | -3.1548602 |
| RAB3D     | -3.1529541 |
| PDXP      | -3.1529504 |
| NELL1     | -3.1513976 |
| TMSB4X    | -3.1512123 |
| IMMT      | -3.1494664 |
| TIMM23    | -3.1485231 |
| PAAF1     | -3.1448611 |
| FAM43B    | -3.1403015 |
| ZNF25     | -3.1397585 |
| MRPS15    | -3.1386009 |
| MANBAL    | -3.1354403 |
| CEND1     | -3.1329066 |
| CDCA8     | -3.1327119 |
| C12orf49  | -3.1323094 |
| COX7A1    | -3.1306386 |
| CGREF1    | -3.1302808 |
| HOXD9     | -3.126221  |
| MAT2B     | -3.1258023 |
| EPHB6     | -3.1229899 |

|                |            |
|----------------|------------|
| PTEN           | -3.120597  |
| NPM2           | -3.1153899 |
| GNB5           | -3.1153318 |
| XK             | -3.1140426 |
| TRUB1          | -3.1084473 |
| RAD1           | -3.1075581 |
| ADORA1         | -3.1074817 |
| MRPL11         | -3.1070203 |
| KCNJ12         | -3.1044501 |
| MAGEA6         | -3.103821  |
| ODC1           | -3.1031378 |
| C2             | -3.1004445 |
| CHCHD4         | -3.0990809 |
| UCHL5          | -3.0990026 |
| HABP4          | -3.0978301 |
| MIR22HG        | -3.0965323 |
| PTPN22         | -3.0958233 |
| HAGH           | -3.0949602 |
| AGMAT          | -3.0942233 |
| ANKRD33B       | -3.0939413 |
| HYLS1          | -3.092776  |
| TOMM22         | -3.0922473 |
| VPS26A         | -3.0914358 |
| TIMM8A         | -3.0864952 |
| BCAP31         | -3.0856896 |
| ST6GALNA<br>C6 | -3.0803902 |
| C16orf95       | -3.080255  |
| SDHB           | -3.0781025 |
| CYCS           | -3.0736571 |
| ISPD           | -3.0691856 |
| ARHGAP25       | -3.063869  |
| IMP4           | -3.0587017 |
| FAM89B         | -3.0584486 |
| HARS           | -3.0571914 |
| BMS1           | -3.0569092 |
| RPL7           | -3.0555406 |
| CLN6           | -3.0528616 |
| TRIM41         | -3.0498377 |
| DMXL2          | -3.0490833 |
| FBXL16         | -3.0477567 |
| SPIB           | -3.0450003 |
| GGN            | -3.0437146 |

|          |            |
|----------|------------|
| MAP1B    | -3.0433452 |
| CMC1     | -3.0419273 |
| SCN8A    | -3.04158   |
| SERPINB2 | -3.0415013 |
| SEC24D   | -3.0414304 |
| RABEPK   | -3.0396739 |
| TAF13    | -3.0367734 |
| MFSD11   | -3.0362661 |
| FARSA    | -3.0338896 |
| UQCRH    | -3.0331346 |
| GLO1     | -3.032069  |
| TMEM38A  | -3.029478  |
| FLRT3    | -3.0277187 |
| RUNDC3A  | -3.0269121 |
| LCE1C    | -3.0227132 |
| TATDN2   | -3.0218022 |
| OTUD6A   | -3.0214787 |
| FAM32A   | -3.0205459 |
| RDH12    | -3.0190742 |
| SAP30L   | -3.0174301 |
| AAK1     | -3.0173688 |
| C11orf74 | -3.0168268 |
| TATDN1   | -3.0152343 |
| TMEM132C | -3.0144846 |
| SLC39A13 | -3.0143978 |
| DPT      | -3.0108119 |
| ANKRD34A | -3.0107554 |
| LYRM7    | -3.0100737 |
| ADO      | -3.0099907 |
| PFDN4    | -3.0098491 |
| VPS37A   | -3.0097798 |
| HIGD1B   | -3.0070244 |
| KCNV1    | -3.0054493 |
| DYTN     | -3.0053672 |
| OR2W5    | -3.0034317 |
| CCKBR    | -3.0013705 |
| CHAF1A   | -3.0003092 |
| SLC22A9  | -2.9999556 |
| FOXRED1  | -2.9988433 |
| CDKL3    | -2.9987014 |
| CISD1    | -2.9977168 |
| SUSD5    | -2.9972606 |
| CPLX1    | -2.9972079 |

|          |            |
|----------|------------|
| ESM1     | -2.9969919 |
| UPK3B    | -2.9968922 |
| DLD      | -2.9968551 |
| MRPL53   | -2.9968073 |
| AARS     | -2.9957761 |
| MPG      | -2.9952696 |
| MRPL15   | -2.9923019 |
| ARHGAP26 | -2.9914209 |
| NSMCE2   | -2.9890005 |
| RAB15    | -2.9846225 |
| OSTF1    | -2.9796759 |
| WDYHV1   | -2.9791214 |
| CBX7     | -2.9775215 |
| FMR1     | -2.9769321 |
| PPP3R1   | -2.9754366 |
| CIDECP   | -2.9753592 |
| PGP      | -2.9736037 |
| B3GNT6   | -2.97101   |
| UBLCP1   | -2.9706327 |
| NDUFA12  | -2.9692105 |
| NAP1L5   | -2.9674989 |
| PRUNE2   | -2.9670344 |
| PTPN4    | -2.9664737 |
| RPL37A   | -2.9629367 |
| DCK      | -2.9614573 |
| RNF157   | -2.9598371 |
| GPR108   | -2.9598209 |
| LAMB3    | -2.9593732 |
| VDAC2    | -2.9577019 |
| CCDC3    | -2.9576254 |
| FBXO45   | -2.9569135 |
| PCSK1    | -2.9565875 |
| LETMD1   | -2.9565396 |
| ING1     | -2.9564847 |
| TMX4     | -2.9548158 |
| SUPT3H   | -2.9540816 |
| SNX17    | -2.9538807 |
| RFTN1    | -2.9532042 |
| COX4I1   | -2.9526547 |
| GRK4     | -2.9513881 |
| DEF8     | -2.9507727 |
| CFL1P1   | -2.9501678 |
| DENND4B  | -2.9493077 |



|               |            |
|---------------|------------|
| CA13          | -2.9482297 |
| ISX           | -2.9473088 |
| TRAK2         | -2.9472445 |
| ETS2          | -2.9469902 |
| NCALD         | -2.9462042 |
| ITPA          | -2.9440395 |
| KHDC1         | -2.9417446 |
| ZNF576        | -2.9410736 |
| FRS3          | -2.9399925 |
| AQP7P1        | -2.9396032 |
| OXR1          | -2.9384721 |
| RASGRP2       | -2.9370921 |
| TRMT61B       | -2.933693  |
| USE1          | -2.9327809 |
| STOML2        | -2.9323424 |
| SNRPA1        | -2.9304029 |
| DNAJA2        | -2.9298551 |
| PRMT5         | -2.9263542 |
| CTNNA2        | -2.9262565 |
| PCDHB15       | -2.9250645 |
| F8            | -2.9234077 |
| RPUSD4        | -2.9214044 |
| HSPA9         | -2.9208829 |
| SMARCC2       | -2.9188935 |
| UQCRFS1       | -2.9188521 |
| TMX3          | -2.9187129 |
| OSBPL1A       | -2.9181809 |
| COX5A         | -2.914463  |
| AIF1          | -2.9142186 |
| ZNF593        | -2.9136821 |
| SLC25A26      | -2.9115827 |
| SLC38A6       | -2.9109502 |
| GAS5          | -2.9096722 |
| NARF          | -2.9089825 |
| BMP10         | -2.90601   |
| RPL9          | -2.9059926 |
| MCAT          | -2.9045671 |
| HIGD1A        | -2.9010368 |
| PPP1R12A      | -2.8996641 |
| EIF2B5        | -2.8982553 |
| GABARAPL<br>3 | -2.8952401 |
| SLC25A3       | -2.893825  |

|          |            |
|----------|------------|
| ABCF1    | -2.8923317 |
| RGS7     | -2.8922156 |
| MRPS22   | -2.892172  |
| TCTE1    | -2.8917361 |
| TUBG2    | -2.8914627 |
| ASGR2    | -2.8899517 |
| KCNMB4   | -2.8892843 |
| FCER1G   | -2.8886771 |
| ATP6V1G2 | -2.8872671 |
| KRT222   | -2.8867537 |
| STK39    | -2.8831464 |
| NEDD8    | -2.8825156 |
| SNRNP27  | -2.8823623 |
| GOT1     | -2.8822738 |
| TPMT     | -2.8812801 |
| CCT6P1   | -2.8809917 |
| PSMD12   | -2.8808875 |
| NGLY1    | -2.8790277 |
| TAF9     | -2.878323  |
| FAM168B  | -2.87804   |
| FAM20A   | -2.8775358 |
| ACTR1B   | -2.876342  |
| RIT2     | -2.8756852 |
| KLHL8    | -2.8755231 |
| RHOBTB2  | -2.8753661 |
| C7orf57  | -2.8737425 |
| CCDC43   | -2.8719389 |
| PFKM     | -2.8704867 |
| TUBG1    | -2.8692839 |
| MTX2     | -2.8682065 |
| RSRC1    | -2.8681108 |
| UQCRHL   | -2.8669789 |
| ENTPD4   | -2.8665177 |
| HECA     | -2.8649216 |
| RPL29P2  | -2.8649079 |
| ZNF223   | -2.8632976 |
| BBS7     | -2.862998  |
| POLDIP2  | -2.862425  |
| MIR205HG | -2.8618493 |
| TXNL4A   | -2.8616084 |
| DCTN6    | -2.8601309 |
| CHI3L1   | -2.8591961 |
| ZNF213   | -2.8546363 |

|           |            |
|-----------|------------|
| KLK9      | -2.8532133 |
| CRYM      | -2.8513979 |
| SULT2B1   | -2.8501127 |
| ZNF517    | -2.8497915 |
| MFF       | -2.8486746 |
| RNFT2     | -2.8485507 |
| SGTB      | -2.8484973 |
| DENND2D   | -2.8455464 |
| DRG1      | -2.8450514 |
| TRIM44    | -2.8450299 |
| PDPN      | -2.8434371 |
| TPK1      | -2.8417366 |
| STAT6     | -2.8406249 |
| LDB2      | -2.8404259 |
| ENDOG     | -2.8395742 |
| SERPINI1  | -2.838105  |
| RP9       | -2.8337881 |
| ESRRA     | -2.8320352 |
| HNF1A-AS1 | -2.8319377 |
| ST8SIA1   | -2.8316774 |
| DGKI      | -2.8287841 |
| FARS2     | -2.8278116 |
| ZFAND2A   | -2.8258835 |
| RCHY1     | -2.8248237 |
| IRAK1     | -2.824327  |
| MPPED1    | -2.8242948 |
| NME5      | -2.8229657 |
| AQP11     | -2.8223731 |
| ERCC1     | -2.8213623 |
| ZCRB1     | -2.8200021 |
| ZW10      | -2.8197166 |
| RNASEH2B  | -2.8178685 |
| PGAM1     | -2.8178172 |
| SLC4A9    | -2.817338  |
| DHRS11    | -2.8158844 |
| SERGEF    | -2.8151598 |
| KCNH1     | -2.8150025 |
| TOMM20L   | -2.814146  |
| AKTIP     | -2.8138121 |
| BNIP3     | -2.8113379 |
| KLK14     | -2.8111149 |
| MGST3     | -2.8100351 |
| DRAP1     | -2.8076676 |

|          |            |
|----------|------------|
| ATP1B3   | -2.8050192 |
| TERF2    | -2.8048712 |
| SATB1    | -2.8040941 |
| RHO      | -2.8039427 |
| HLA-DRB1 | -2.8027065 |
| WSB2     | -2.8018908 |
| CA11     | -2.801106  |
| RGS10    | -2.8009734 |
| TMEM163  | -2.7992869 |
| RPL31P11 | -2.7986664 |
| PPP3R2   | -2.7977942 |
| CDC123   | -2.7970828 |
| NMNAT2   | -2.7961198 |
| DYNC1I1  | -2.7960227 |
| MRPS18C  | -2.7955366 |
| FAM3C    | -2.7955125 |
| TM2D1    | -2.7942331 |
| FKBP3    | -2.7920511 |
| NDUFS5   | -2.791734  |
| SH3KBP1  | -2.7896461 |
| SCYL1    | -2.7888954 |
| OXA1L    | -2.7877594 |
| TM7SF3   | -2.7854621 |
| AHNAK2   | -2.7850014 |
| A2ML1    | -2.7838576 |
| ASB13    | -2.7830114 |
| CAPZA2   | -2.7828072 |
| ARSG     | -2.782224  |
| ABI3     | -2.7819786 |
| FAP      | -2.7816527 |
| GSTZ1    | -2.7813813 |
| CHN1     | -2.7808479 |
| EML6     | -2.7807637 |
| HLA-DPA1 | -2.7802845 |
| SPSB4    | -2.7801353 |
| PSMC5    | -2.7773812 |
| TRUB2    | -2.7764754 |
| MPND     | -2.7752362 |
| ARL6IP4  | -2.7751111 |
| PRPSAP1  | -2.7750009 |
| RPP40    | -2.7747521 |
| LARP1B   | -2.7743731 |
| MYO5A    | -2.7722897 |

|                |            |
|----------------|------------|
| POLR2E         | -2.7716118 |
| HCRTR1         | -2.7710502 |
| B4GALT6        | -2.7700447 |
| STXBP5L        | -2.7683589 |
| FBXO6          | -2.7683296 |
| AGBL2          | -2.7671152 |
| FLVCR1-<br>AS1 | -2.7661802 |
| PACRG          | -2.7660257 |
| DDHD2          | -2.7655324 |
| TMEM150B       | -2.7645188 |
| CETN4P         | -2.7645008 |
| TUBA8          | -2.7631009 |
| FKBP1B         | -2.7627268 |
| C21orf58       | -2.761731  |
| NIPSNAP1       | -2.7614464 |
| GPR78          | -2.7607427 |
| TLN2           | -2.7604562 |
| ALPP           | -2.7590278 |
| GRIA3          | -2.7581289 |
| FGF12          | -2.757237  |
| DPP10          | -2.7571413 |
| ZIC4           | -2.7551814 |
| UMOD           | -2.7550965 |
| GRK5           | -2.7523248 |
| CARTPT         | -2.7513172 |
| TFPT           | -2.7504056 |
| EXTL1          | -2.7488631 |
| KIF3B          | -2.7488555 |
| WASF3          | -2.7487558 |
| PPP2R2C        | -2.7487013 |
| GPR153         | -2.7485733 |
| OPTN           | -2.7483694 |
| GGNBP2         | -2.7468265 |
| COG6           | -2.7467625 |
| MECR           | -2.7460891 |
| ANKRD52        | -2.7436556 |
| UBE2F          | -2.7432943 |
| ZNF358         | -2.7427356 |
| HAR1A          | -2.7426083 |
| KATNB1         | -2.7396266 |
| RAP1GDS1       | -2.7389063 |
| CTSD           | -2.7388537 |

|           |            |
|-----------|------------|
| ERN2      | -2.738271  |
| PTRHD1    | -2.7382219 |
| PSMD6     | -2.7378406 |
| PPP1CA    | -2.737131  |
| PLEKHA8   | -2.7362217 |
| NTN4      | -2.7357592 |
| ZBTB26    | -2.7331454 |
| OLFM3     | -2.7331015 |
| SLC35F3   | -2.7324128 |
| TSR1      | -2.7313001 |
| PRDM10    | -2.7306943 |
| GMFB      | -2.7293993 |
| TMEM126A  | -2.726737  |
| PIP4K2C   | -2.7266375 |
| VSNL1     | -2.7261276 |
| CDH22     | -2.7234324 |
| POLR1E    | -2.7223714 |
| MLST8     | -2.7197907 |
| NNT       | -2.7186096 |
| LY6E      | -2.7185202 |
| PYY2      | -2.7182252 |
| DDX1      | -2.7179384 |
| RRP12     | -2.7172949 |
| PPM1A     | -2.7158605 |
| PLCL2     | -2.7155626 |
| COASY     | -2.7149953 |
| SYTL2     | -2.7143944 |
| SV2C      | -2.711352  |
| SCGB1A1   | -2.7102053 |
| LOC407835 | -2.7097351 |
| EIF4G1    | -2.7095064 |
| YWHAG     | -2.7088348 |
| CAPNS1    | -2.7085817 |
| RND2      | -2.7084827 |
| KIF20A    | -2.7077901 |
| ACTN2     | -2.7075992 |
| MTIF2     | -2.7065182 |
| TMEM155   | -2.7050295 |
| BUD31     | -2.7049185 |
| CHMP5     | -2.7042815 |
| SERP2     | -2.7037803 |
| BAP1      | -2.7022215 |
| CCNI      | -2.700584  |

|          |            |
|----------|------------|
| CCDC39   | -2.6991178 |
| CYTH4    | -2.6985828 |
| HDDC2    | -2.6985553 |
| MRPL37   | -2.6979951 |
| ZDHHC17  | -2.6976756 |
| ROPN1L   | -2.6963491 |
| NDUFA4   | -2.6961294 |
| MRT04    | -2.6955612 |
| ERRFI1   | -2.6952509 |
| AZI2     | -2.6936839 |
| COL19A1  | -2.6907982 |
| PEX11B   | -2.6885281 |
| KCTD9    | -2.6847387 |
| SLC17A9  | -2.6842744 |
| SLAMF8   | -2.6833399 |
| CORO2A   | -2.6830872 |
| RTKN2    | -2.6828184 |
| FITM1    | -2.6817405 |
| COPS8    | -2.6810386 |
| VAPB     | -2.6808581 |
| CBX6     | -2.6806602 |
| FAM49B   | -2.6801498 |
| RPL21P44 | -2.6793414 |
| YARS     | -2.6781928 |
| CD53     | -2.6780712 |
| NT5M     | -2.6775535 |
| NAP1L2   | -2.6771026 |
| ZEB1     | -2.6766573 |
| SDHD     | -2.6762086 |
| CDK5     | -2.6755352 |
| MAD2L1BP | -2.675333  |
| RTN4RL2  | -2.6745079 |
| ATP6V0E2 | -2.6731728 |
| KNG1     | -2.6726878 |
| KCNA2    | -2.6724103 |
| VAX2     | -2.6723635 |
| PPP1R15B | -2.672055  |
| RTN2     | -2.6716894 |
| RHCE     | -2.671177  |
| FAM57B   | -2.6707769 |
| DLGAP1   | -2.6706033 |
| SUCLA2   | -2.6699873 |
| UQCRC1   | -2.6695442 |

|          |            |
|----------|------------|
| MTFMT    | -2.6689673 |
| SORCS1   | -2.668203  |
| FBXL15   | -2.6670353 |
| TDRD7    | -2.6663523 |
| ZNHIT3   | -2.666337  |
| TUBB8    | -2.6646364 |
| PCMT1    | -2.6646127 |
| RASD1    | -2.664271  |
| CASQ1    | -2.6639485 |
| MTRF1L   | -2.6628615 |
| CHML     | -2.6626317 |
| ICA1     | -2.6621383 |
| TMEM173  | -2.6614419 |
| MAN2B2   | -2.6609641 |
| CSF3R    | -2.6597524 |
| SERINC3  | -2.6593319 |
| TSPAN7   | -2.6590708 |
| CCL25    | -2.6573376 |
| ALKBH6   | -2.6570435 |
| NDUFB5   | -2.6569323 |
| PCGF3    | -2.6553856 |
| MCOLN1   | -2.6544028 |
| CPLX2    | -2.6529525 |
| FEM1A    | -2.6522167 |
| TYROBP   | -2.6521717 |
| ASB4     | -2.6503084 |
| TMEM191A | -2.6500164 |
| DALRD3   | -2.6497111 |
| GAP43    | -2.6493235 |
| MPP6     | -2.6460541 |
| PITPNM1  | -2.6459434 |
| HINT1    | -2.6453678 |
| CCDC124  | -2.6444246 |
| NGEF     | -2.644377  |
| AKT3     | -2.6440423 |
| NRIP3    | -2.6438811 |
| WDR45    | -2.64139   |
| RSPH3    | -2.6396979 |
| IDH3B    | -2.6385656 |
| ELAVL4   | -2.6383551 |
| APEH     | -2.636391  |
| TRAF3IP3 | -2.6362758 |
| PRKAB1   | -2.6349174 |



|          |            |
|----------|------------|
| NDUFV2   | -2.6347833 |
| CCND2    | -2.6328885 |
| CHMP4A   | -2.6323448 |
| VAMP1    | -2.6322344 |
| PPP2R2D  | -2.6319321 |
| RNASEH1  | -2.6317499 |
| MRPL12   | -2.6313425 |
| C12orf43 | -2.6295372 |
| OR4K2    | -2.6284741 |
| NDUFA7   | -2.6267802 |
| PELI3    | -2.6259826 |
| ME3      | -2.6259797 |
| RPSAP52  | -2.6259369 |
| RPF2     | -2.6252764 |
| TWF2     | -2.6242597 |
| UBE2E2   | -2.6233375 |
| IL17RE   | -2.6224403 |
| DCTD     | -2.6215237 |
| ARHGEF4  | -2.6201438 |
| MMADHC   | -2.6196376 |
| ST13P4   | -2.619548  |
| WDR93    | -2.6190425 |
| ASS1     | -2.618842  |
| TBC1D9   | -2.618477  |
| FEZ2     | -2.6184573 |
| TASP1    | -2.6179414 |
| CALM3    | -2.6178629 |
| C9orf163 | -2.6177007 |
| NAT8L    | -2.6173793 |
| XCR1     | -2.6157607 |
| STX1A    | -2.6156634 |
| NPW      | -2.6156591 |
| TOLLIP   | -2.6154364 |
| MAP3K10  | -2.6147907 |
| SLC25A11 | -2.6146234 |
| TUBA1A   | -2.6146003 |
| TCTEX1D1 | -2.6140032 |
| CCNB1    | -2.6139739 |
| COL11A1  | -2.6134878 |
| COMMD9   | -2.6132491 |
| RWDD2B   | -2.6119905 |
| SYNGR3   | -2.6113128 |
| GPX5     | -2.6110185 |

|          |            |
|----------|------------|
| KCNJ8    | -2.610291  |
| SBDSP1   | -2.6098307 |
| C1orf123 | -2.6092331 |
| MNAT1    | -2.6084234 |
| LSM1     | -2.6083064 |
| MTCH2    | -2.6079945 |
| FBXW5    | -2.6079365 |
| FAM9B    | -2.6079124 |
| GLRX     | -2.6072725 |
| CXCL3    | -2.606671  |
| GLRX3    | -2.6062488 |
| ARMC6    | -2.6060692 |
| FBXO16   | -2.6036095 |
| IDNK     | -2.602198  |
| RAD23B   | -2.6015554 |
| HMGB3    | -2.6014787 |
| HSPB3    | -2.5985089 |
| BAG1     | -2.5975532 |
| DPP8     | -2.597103  |
| RNF14    | -2.5962628 |
| MRPL51   | -2.5961981 |
| C9orf129 | -2.5959534 |
| DNAJC4   | -2.592662  |
| GPR161   | -2.5917895 |
| GUK1     | -2.5908548 |
| TAF1D    | -2.5905283 |
| TMEM8B   | -2.5904412 |
| CISD3    | -2.5896221 |
| CENPK    | -2.5893982 |
| SLC30A9  | -2.5888733 |
| NCK2     | -2.5886757 |
| PPP1R3F  | -2.5875002 |
| PAIP2    | -2.5858666 |
| SPDEF    | -2.5840326 |
| RPS27    | -2.583432  |
| MTUS2    | -2.5820604 |
| NSDHL    | -2.5817982 |
| DYNLT3   | -2.5817038 |
| MRPL48   | -2.5806448 |
| GOLGA5   | -2.5792632 |
| FAM135B  | -2.579032  |
| EMC3     | -2.5788407 |
| ENPP5    | -2.5784064 |

|         |            |
|---------|------------|
| ITM2B   | -2.578375  |
| NDUFAF1 | -2.5771953 |
| PKD2L1  | -2.5763228 |
| ETV6    | -2.575834  |
| APOL2   | -2.575735  |
| RNF216  | -2.5747205 |
| CNIH3   | -2.5729808 |
| UBAC2   | -2.5728112 |
| DUS1L   | -2.5718428 |
| DND1    | -2.5709478 |
| NOA1    | -2.570822  |
| ARMC10  | -2.5706624 |
| NIPA1   | -2.5697766 |
| SARS    | -2.5684993 |
| PRDM11  | -2.5684252 |
| TTY15   | -2.5682419 |
| RPUSD1  | -2.5679161 |
| CALML3  | -2.5661886 |
| NPHS2   | -2.5649582 |
| CDC26   | -2.5647044 |
| CCDC91  | -2.5646253 |
| ZC4H2   | -2.5645834 |
| PFN1    | -2.5640967 |
| PPP2CB  | -2.5632099 |
| ACHE    | -2.562719  |
| LMO1    | -2.562321  |
| TMEM141 | -2.5617051 |
| NAPSB   | -2.5586997 |
| ABTB1   | -2.558554  |
| STEAP2  | -2.5571628 |
| OCEL1   | -2.5570403 |
| PSMC2   | -2.5567874 |
| MYBBP1A | -2.5557077 |
| OR2W3   | -2.5547983 |
| EIF3A   | -2.5546006 |
| TTC39A  | -2.5543505 |
| KRR1    | -2.5534962 |
| TOMM40L | -2.5527767 |
| PGAM1P5 | -2.5526289 |
| LALBA   | -2.5525236 |
| NDUFB2  | -2.5520427 |
| TMEM14B | -2.5501817 |
| SYNJ1   | -2.5493331 |

|                |            |
|----------------|------------|
| C2orf69        | -2.5482566 |
| MRPS28         | -2.5480501 |
| NANOS3         | -2.5473365 |
| SMS            | -2.5471948 |
| TAF4B          | -2.5468145 |
| SHD            | -2.5466571 |
| CHAC1          | -2.546512  |
| SNX3           | -2.5446162 |
| SLC4A1AP       | -2.5435582 |
| VPS13A         | -2.5426343 |
| MYEF2          | -2.5413768 |
| CYP1B1-<br>AS1 | -2.5412827 |
| CDR2           | -2.5405092 |
| ENTPD6         | -2.5395428 |
| RAB42          | -2.5390372 |
| AKAP12         | -2.5380503 |
| OPN4           | -2.5376786 |
| ZFP91          | -2.5373217 |
| PPIL3          | -2.5365304 |
| AQP2           | -2.536469  |
| OR10H5         | -2.5364018 |
| WDR41          | -2.5363866 |
| DVL1           | -2.5362119 |
| SPRR2E         | -2.535224  |
| DCTN1          | -2.5341129 |
| NLRC5          | -2.5341045 |
| EPHA3          | -2.5338038 |
| FBXW7          | -2.5334906 |
| GNA15          | -2.5324698 |
| RARB           | -2.531893  |
| SLC25A46       | -2.5317661 |
| FIBP           | -2.5317024 |
| C8orf33        | -2.5312157 |
| C1orf158       | -2.5304941 |
| MALSU1         | -2.5299868 |
| APOOL          | -2.5297531 |
| ATCAY          | -2.5284561 |
| GDF7           | -2.5276145 |
| OR4D10         | -2.5272106 |
| TRMT12         | -2.5267569 |
| COQ10A         | -2.5263452 |
| CHMP4C         | -2.526281  |

|          |            |
|----------|------------|
| LRRC15   | -2.5259993 |
| C1QB     | -2.5245338 |
| MTO1     | -2.5241246 |
| PCDHAC2  | -2.5236821 |
| MDH2     | -2.5228979 |
| ZNF582   | -2.5221604 |
| SLC6A13  | -2.5216393 |
| NKX2-3   | -2.5208598 |
| RALBP1   | -2.5201691 |
| GGCT     | -2.5191475 |
| HMG20A   | -2.5191016 |
| ACTR6    | -2.5167339 |
| ARPC5L   | -2.5161856 |
| SEH1L    | -2.515748  |
| NDUFS6   | -2.5150187 |
| CTNNBIP1 | -2.5146357 |
| MCF2L2   | -2.5130667 |
| CACNB1   | -2.5125411 |
| NDUFA6   | -2.5122025 |
| TAF6     | -2.512187  |
| CIDEA    | -2.5120141 |
| OXNAD1   | -2.5115627 |
| ZSCAN5A  | -2.5114533 |
| STMN2    | -2.510632  |
| HPRT1    | -2.5097577 |
| H1FNT    | -2.5083273 |
| NDUFB4   | -2.5071608 |
| IMP3     | -2.5070751 |
| MKKS     | -2.5066575 |
| THUMPD2  | -2.5065912 |
| MEX3D    | -2.5061434 |
| CTSK     | -2.5043467 |
| HCRT     | -2.5043342 |
| GDF10    | -2.5040214 |
| PLA2G5   | -2.5038494 |
| DOPEY2   | -2.5035742 |
| KCNAB1   | -2.50219   |
| RAPGEF1  | -2.5011066 |
| GRPEL2   | -2.4997267 |
| LY9      | -2.4992676 |
| BRK1     | -2.4988563 |
| ATG16L2  | -2.4984735 |
| SCN2B    | -2.4976452 |

|          |            |
|----------|------------|
| PTP4A1   | -2.4975567 |
| SLAMF9   | -2.4957508 |
| DYDC2    | -2.4927855 |
| GNB1     | -2.4922636 |
| CAMK4    | -2.4919338 |
| TRAF3IP1 | -2.4914162 |
| PIH1D1   | -2.4912981 |
| EEF1B2   | -2.4909193 |
| ALOX5AP  | -2.4897621 |
| SYAP1    | -2.4890887 |
| EIF4E1B  | -2.4888188 |
| SUSD3    | -2.4870549 |
| FBXW2    | -2.4858543 |
| DNAJC18  | -2.4846971 |
| PI4KA    | -2.4838714 |
| ELP3     | -2.4837308 |
| EN2      | -2.4835492 |
| SENP2    | -2.4833341 |
| LDHA     | -2.4829614 |
| HNRNPD   | -2.4828908 |
| OR5V1    | -2.4825414 |
| PLA2G7   | -2.4822932 |
| UBE3A    | -2.4822572 |
| GBA2     | -2.4817666 |
| RAB4A    | -2.4806329 |
| APBB1IP  | -2.4797377 |
| FSTL4    | -2.4795916 |
| OR2H1    | -2.4793292 |
| PREP     | -2.4784388 |
| GLRB     | -2.4784239 |
| MRPS14   | -2.4779189 |
| AGTPBP1  | -2.4773223 |

**Table 5 GO terms enriched in the top 10% of genes positively associated with cortical volume in preHD**

| <b>GO Term</b> | <b>Description</b>                                       | <b>P value</b> |
|----------------|----------------------------------------------------------|----------------|
| GO:0032501     | multicellular organismal process                         | 1.21E-27       |
| GO:0048513     | animal organ development                                 | 2.17E-27       |
| GO:0048856     | anatomical structure development                         | 2.07E-26       |
| GO:0007275     | multicellular organism development                       | 5.51E-26       |
| GO:0009653     | anatomical structure morphogenesis                       | 2.83E-25       |
| GO:0032502     | developmental process                                    | 3.87E-25       |
| GO:0048731     | system development                                       | 1.24E-24       |
| GO:0009888     | tissue development                                       | 1.05E-23       |
| GO:0009887     | animal organ morphogenesis                               | 4.94E-23       |
| GO:0072359     | circulatory system development                           | 7.56E-20       |
| GO:0050896     | response to stimulus                                     | 1.76E-18       |
| GO:0065007     | biological regulation                                    | 2.52E-16       |
| GO:0048646     | anatomical structure formation involved in morphogenesis | 3.84E-16       |
| GO:0060429     | epithelium development                                   | 1.55E-15       |
| GO:0048869     | cellular developmental process                           | 2.14E-15       |
| GO:0030154     | cell differentiation                                     | 2.47E-15       |
| GO:0007154     | cell communication                                       | 6.77E-15       |
| GO:0050794     | regulation of cellular process                           | 8.51E-15       |
| GO:0023052     | signaling                                                | 1.69E-14       |
| GO:0035295     | tube development                                         | 1.92E-14       |
| GO:0051716     | cellular response to stimulus                            | 1.28E-13       |
| GO:0007165     | signal transduction                                      | 9.66E-13       |
| GO:0050789     | regulation of biological process                         | 1.56E-12       |
| GO:0030198     | extracellular matrix organization                        | 2.50E-12       |
| GO:0043062     | extracellular structure organization                     | 2.78E-12       |
| GO:0045229     | external encapsulating structure organization            | 3.44E-12       |
| GO:0001944     | vasculature development                                  | 3.96E-12       |
| GO:0035239     | tube morphogenesis                                       | 4.24E-12       |
| GO:0016477     | cell migration                                           | 5.54E-12       |
| GO:0001568     | blood vessel development                                 | 6.94E-12       |
| GO:0050793     | regulation of developmental process                      | 7.59E-12       |
| GO:0009790     | embryo development                                       | 1.20E-11       |
| GO:0008283     | cell population proliferation                            | 1.83E-11       |
| GO:0030855     | epithelial cell differentiation                          | 4.68E-11       |
| GO:0042127     | regulation of cell population proliferation              | 1.19E-10       |
| GO:0007507     | heart development                                        | 1.91E-10       |
| GO:0007166     | cell surface receptor signaling pathway                  | 2.50E-10       |
| GO:0061061     | muscle structure development                             | 3.28E-10       |
| GO:0051239     | regulation of multicellular organismal process           | 4.46E-10       |
| GO:0048514     | blood vessel morphogenesis                               | 7.02E-10       |

|            |                                                        |          |
|------------|--------------------------------------------------------|----------|
| GO:0048518 | positive regulation of biological process              | 9.37E-10 |
| GO:0048729 | tissue morphogenesis                                   | 1.10E-09 |
| GO:0042221 | response to chemical                                   | 1.59E-09 |
| GO:0051674 | localization of cell                                   | 1.67E-09 |
| GO:0048870 | cell motility                                          | 1.67E-09 |
| GO:0001655 | urogenital system development                          | 3.25E-09 |
| GO:0003007 | heart morphogenesis                                    | 1.07E-08 |
| GO:0048522 | positive regulation of cellular process                | 1.37E-08 |
| GO:0048523 | negative regulation of cellular process                | 2.06E-08 |
| GO:0003013 | circulatory system process                             | 6.99E-08 |
| GO:0007155 | cell adhesion                                          | 8.15E-08 |
| GO:0065008 | regulation of biological quality                       | 8.86E-08 |
| GO:0030334 | regulation of cell migration                           | 8.88E-08 |
| GO:0009605 | response to external stimulus                          | 1.10E-07 |
| GO:0040011 | locomotion                                             | 1.14E-07 |
| GO:0003018 | vascular process in circulatory system                 | 1.21E-07 |
| GO:0072001 | renal system development                               | 1.62E-07 |
| GO:0001822 | kidney development                                     | 3.31E-07 |
| GO:0040012 | regulation of locomotion                               | 4.12E-07 |
| GO:0010646 | regulation of cell communication                       | 4.23E-07 |
| GO:2000026 | regulation of multicellular organismal development     | 5.80E-07 |
| GO:0040017 | positive regulation of locomotion                      | 6.23E-07 |
| GO:0048583 | regulation of response to stimulus                     | 6.80E-07 |
| GO:0048468 | cell development                                       | 9.71E-07 |
| GO:0003008 | system process                                         | 1.08E-06 |
| GO:0007399 | nervous system development                             | 1.11E-06 |
| GO:0023051 | regulation of signaling                                | 1.12E-06 |
| GO:2000145 | regulation of cell motility                            | 1.17E-06 |
| GO:0001525 | angiogenesis                                           | 1.94E-06 |
| GO:0030335 | positive regulation of cell migration                  | 2.17E-06 |
| GO:0030199 | collagen fibril organization                           | 3.03E-06 |
| GO:0051270 | regulation of cellular component movement              | 3.68E-06 |
| GO:0061448 | connective tissue development                          | 4.03E-06 |
| GO:0001503 | ossification                                           | 4.09E-06 |
| GO:0001501 | skeletal system development                            | 4.29E-06 |
| GO:0010033 | response to organic substance                          | 5.08E-06 |
| GO:0051272 | positive regulation of cellular component movement     | 5.64E-06 |
| GO:0070887 | cellular response to chemical stimulus                 | 6.17E-06 |
| GO:2000147 | positive regulation of cell motility                   | 8.27E-06 |
| GO:0032879 | regulation of localization                             | 1.08E-05 |
| GO:0010604 | positive regulation of macromolecule metabolic process | 1.18E-05 |
| GO:0006928 | movement of cell or subcellular component              | 1.37E-05 |
| GO:0048568 | embryonic organ development                            | 1.60E-05 |



|            |                                                                         |          |
|------------|-------------------------------------------------------------------------|----------|
| GO:0051254 | positive regulation of RNA metabolic process                            | 1.85E-05 |
| GO:0009893 | positive regulation of metabolic process                                | 2.48E-05 |
| GO:0009966 | regulation of signal transduction                                       | 2.99E-05 |
| GO:0043588 | skin development                                                        | 2.99E-05 |
| GO:0007204 | positive regulation of cytosolic calcium ion concentration              | 3.07E-05 |
| GO:0002009 | morphogenesis of an epithelium                                          | 4.13E-05 |
| GO:1902680 | positive regulation of RNA biosynthetic process                         | 4.70E-05 |
| GO:0048519 | negative regulation of biological process                               | 5.00E-05 |
| GO:0008284 | positive regulation of cell population proliferation                    | 5.13E-05 |
| GO:0072132 | mesenchyme morphogenesis                                                | 5.35E-05 |
| GO:0003170 | heart valve development                                                 | 5.40E-05 |
| GO:0009792 | embryo development ending in birth or egg hatching                      | 5.70E-05 |
| GO:0007423 | sensory organ development                                               | 5.75E-05 |
| GO:0043009 | chordate embryonic development                                          | 6.11E-05 |
| GO:0048598 | embryonic morphogenesis                                                 | 6.30E-05 |
| GO:0003179 | heart valve morphogenesis                                               | 6.68E-05 |
| GO:0045944 | positive regulation of transcription by RNA polymerase II               | 6.98E-05 |
| GO:0072006 | nephron development                                                     | 7.48E-05 |
| GO:0045893 | positive regulation of transcription, DNA-templated                     | 8.28E-05 |
| GO:1903508 | positive regulation of nucleic acid-templated transcription             | 8.28E-05 |
| GO:0031328 | positive regulation of cellular biosynthetic process                    | 8.37E-05 |
| GO:0006950 | response to stress                                                      | 9.69E-05 |
| GO:0009891 | positive regulation of biosynthetic process                             | 9.99E-05 |
| GO:0051093 | negative regulation of developmental process                            | 0.00011  |
| GO:0051240 | positive regulation of multicellular organismal process                 | 0.000112 |
| GO:2001236 | regulation of extrinsic apoptotic signaling pathway                     | 0.000129 |
| GO:0045446 | endothelial cell differentiation                                        | 0.000136 |
| GO:0010647 | positive regulation of cell communication                               | 0.000144 |
| GO:0045595 | regulation of cell differentiation                                      | 0.000148 |
| GO:0042592 | homeostatic process                                                     | 0.000149 |
| GO:0023056 | positive regulation of signaling                                        | 0.00016  |
| GO:0060537 | muscle tissue development                                               | 0.000174 |
| GO:0003158 | endothelium development                                                 | 0.000189 |
| GO:0010557 | positive regulation of macromolecule biosynthetic process               | 0.00019  |
| GO:0008015 | blood circulation                                                       | 0.000205 |
| GO:0045935 | positive regulation of nucleobase-containing compound metabolic process | 0.000219 |
| GO:0072009 | nephron epithelium development                                          | 0.000259 |
| GO:0050673 | epithelial cell proliferation                                           | 0.000275 |
| GO:0042692 | muscle cell differentiation                                             | 0.000287 |
| GO:0034329 | cell junction assembly                                                  | 0.000296 |
| GO:0051094 | positive regulation of developmental process                            | 0.000398 |
| GO:0009968 | negative regulation of signal transduction                              | 0.000411 |
| GO:0051216 | cartilage development                                                   | 0.000445 |

|            |                                                                |          |
|------------|----------------------------------------------------------------|----------|
| GO:0031325 | positive regulation of cellular metabolic process              | 0.000494 |
| GO:0060485 | mesenchyme development                                         | 0.000568 |
| GO:0051241 | negative regulation of multicellular organismal process        | 0.000613 |
| GO:0001667 | ameboidal-type cell migration                                  | 0.000665 |
| GO:0048584 | positive regulation of response to stimulus                    | 0.000705 |
| GO:0022008 | neurogenesis                                                   | 0.000798 |
| GO:0001570 | vasculogenesis                                                 | 0.000821 |
| GO:0085029 | extracellular matrix assembly                                  | 0.000997 |
| GO:0048585 | negative regulation of response to stimulus                    | 0.001069 |
| GO:0071310 | cellular response to organic substance                         | 0.001075 |
| GO:0033002 | muscle cell proliferation                                      | 0.001162 |
| GO:0072073 | kidney epithelium development                                  | 0.001204 |
| GO:0071363 | cellular response to growth factor stimulus                    | 0.001258 |
| GO:0060840 | artery development                                             | 0.001459 |
| GO:0006935 | chemotaxis                                                     | 0.001516 |
| GO:0042330 | taxis                                                          | 0.001646 |
| GO:0035850 | epithelial cell differentiation involved in kidney development | 0.001865 |
| GO:1901888 | regulation of cell junction assembly                           | 0.002051 |
| GO:0048771 | tissue remodeling                                              | 0.002214 |
| GO:0007517 | muscle organ development                                       | 0.002361 |
| GO:0045216 | cell-cell junction organization                                | 0.002594 |
| GO:0050678 | regulation of epithelial cell proliferation                    | 0.002646 |
| GO:0009719 | response to endogenous stimulus                                | 0.002872 |
| GO:0097191 | extrinsic apoptotic signaling pathway                          | 0.002945 |
| GO:0032101 | regulation of response to external stimulus                    | 0.003143 |
| GO:0050900 | leukocyte migration                                            | 0.003153 |
| GO:0080090 | regulation of primary metabolic process                        | 0.003378 |
| GO:0022603 | regulation of anatomical structure morphogenesis               | 0.003721 |
| GO:0051173 | positive regulation of nitrogen compound metabolic process     | 0.003722 |
| GO:0035296 | regulation of tube diameter                                    | 0.003998 |
| GO:0097746 | blood vessel diameter maintenance                              | 0.003998 |
| GO:0070848 | response to growth factor                                      | 0.004006 |
| GO:0040007 | growth                                                         | 0.004156 |
| GO:0007186 | G protein-coupled receptor signaling pathway                   | 0.004423 |
| GO:1903596 | regulation of gap junction assembly                            | 0.004349 |
| GO:0035150 | regulation of tube size                                        | 0.004399 |
| GO:0023057 | negative regulation of signaling                               | 0.004405 |
| GO:0003206 | cardiac chamber morphogenesis                                  | 0.004475 |
| GO:0007267 | cell-cell signaling                                            | 0.004469 |
| GO:0048863 | stem cell differentiation                                      | 0.005195 |
| GO:0060562 | epithelial tube morphogenesis                                  | 0.005385 |
| GO:0080134 | regulation of response to stress                               | 0.005691 |
| GO:0048738 | cardiac muscle tissue development                              | 0.006341 |

|            |                                                      |          |
|------------|------------------------------------------------------|----------|
| GO:0009967 | positive regulation of signal transduction           | 0.007231 |
| GO:0010648 | negative regulation of cell communication            | 0.007689 |
| GO:0048844 | artery morphogenesis                                 | 0.008075 |
| GO:0007043 | cell-cell junction assembly                          | 0.009161 |
| GO:0065009 | regulation of molecular function                     | 0.009873 |
| GO:0048562 | embryonic organ morphogenesis                        | 0.010144 |
| GO:0008285 | negative regulation of cell population proliferation | 0.010926 |
| GO:0031323 | regulation of cellular metabolic process             | 0.010946 |
| GO:0061005 | cell differentiation involved in kidney development  | 0.011095 |
| GO:0030182 | neuron differentiation                               | 0.011118 |
| GO:0003197 | endocardial cushion development                      | 0.011632 |
| GO:0034330 | cell junction organization                           | 0.01192  |
| GO:0002064 | epithelial cell development                          | 0.012683 |
| GO:0001935 | endothelial cell proliferation                       | 0.01296  |
| GO:0009612 | response to mechanical stimulus                      | 0.014595 |
| GO:0048660 | regulation of smooth muscle cell proliferation       | 0.01561  |
| GO:0003171 | atrioventricular valve development                   | 0.015818 |
| GO:0051146 | striated muscle cell differentiation                 | 0.015887 |
| GO:0014706 | striated muscle tissue development                   | 0.01762  |
| GO:0007389 | pattern specification process                        | 0.018105 |
| GO:0009611 | response to wounding                                 | 0.018108 |
| GO:0003012 | muscle system process                                | 0.019098 |
| GO:1903598 | positive regulation of gap junction assembly         | 0.019597 |
| GO:0048880 | sensory system development                           | 0.020252 |
| GO:0042981 | regulation of apoptotic process                      | 0.020331 |
| GO:0003272 | endocardial cushion formation                        | 0.020585 |
| GO:0003151 | outflow tract morphogenesis                          | 0.020904 |
| GO:0043067 | regulation of programmed cell death                  | 0.020927 |
| GO:0042063 | gliogenesis                                          | 0.021828 |
| GO:2001233 | regulation of apoptotic signaling pathway            | 0.022152 |
| GO:0098609 | cell-cell adhesion                                   | 0.022765 |
| GO:0048659 | smooth muscle cell proliferation                     | 0.024207 |
| GO:0055001 | muscle cell development                              | 0.024724 |
| GO:0048589 | developmental growth                                 | 0.025136 |
| GO:0045597 | positive regulation of cell differentiation          | 0.025823 |
| GO:0003231 | cardiac ventricle development                        | 0.026538 |
| GO:0031324 | negative regulation of cellular metabolic process    | 0.027618 |
| GO:0048699 | generation of neurons                                | 0.029955 |
| GO:0032835 | glomerulus development                               | 0.031272 |
| GO:0060993 | kidney morphogenesis                                 | 0.033595 |
| GO:0051179 | localization                                         | 0.034515 |
| GO:0010001 | glial cell differentiation                           | 0.034754 |
| GO:0001654 | eye development                                      | 0.035581 |

|            |                                                              |          |
|------------|--------------------------------------------------------------|----------|
| GO:0048608 | reproductive structure development                           | 0.036926 |
| GO:2001237 | negative regulation of extrinsic apoptotic signaling pathway | 0.037381 |
| GO:0009889 | regulation of biosynthetic process                           | 0.039225 |
| GO:0006954 | inflammatory response                                        | 0.040227 |
| GO:0031326 | regulation of cellular biosynthetic process                  | 0.041333 |
| GO:0010941 | regulation of cell death                                     | 0.041803 |
| GO:0061458 | reproductive system development                              | 0.041942 |
| GO:0001701 | in utero embryonic development                               | 0.042643 |
| GO:0150063 | visual system development                                    | 0.042643 |
| GO:0051171 | regulation of nitrogen compound metabolic process            | 0.043863 |
| GO:0071495 | cellular response to endogenous stimulus                     | 0.045963 |
| GO:0003205 | cardiac chamber development                                  | 0.046208 |

**Table 6 GO terms enriched in the top 10% of genes negatively associated with cortical volume in preHD**

| <b>GO Term</b> | <b>Description</b>                              | <b>P value</b> |
|----------------|-------------------------------------------------|----------------|
| GO:0044260     | cellular macromolecule metabolic process        | 2.06E-06       |
| GO:1901564     | organonitrogen compound metabolic process       | 1.38E-05       |
| GO:0019538     | protein metabolic process                       | 8.52E-05       |
| GO:0044267     | cellular protein metabolic process              | 9.96E-05       |
| GO:0006793     | phosphorus metabolic process                    | 0.00037327     |
| GO:0006796     | phosphate-containing compound metabolic process | 0.00044584     |
| GO:0043412     | macromolecule modification                      | 0.00119709     |
| GO:0099536     | synaptic signaling                              | 0.00272483     |
| GO:0006470     | protein dephosphorylation                       | 0.00302114     |
| GO:0048167     | regulation of synaptic plasticity               | 0.00565147     |
| GO:0036211     | protein modification process                    | 0.01119971     |
| GO:0006464     | cellular protein modification process           | 0.01119971     |
| GO:0007399     | nervous system development                      | 0.02198707     |
| GO:0050806     | positive regulation of synaptic transmission    | 0.02356441     |
| GO:0035335     | peptidyl-tyrosine dephosphorylation             | 0.02959106     |
| GO:0007268     | chemical synaptic transmission                  | 0.03163031     |
| GO:0098916     | anterograde trans-synaptic signaling            | 0.03163031     |
| GO:0009987     | cellular process                                | 0.03712352     |
| GO:0099537     | trans-synaptic signaling                        | 0.04080404     |
| GO:0050804     | modulation of chemical synaptic transmission    | 0.04542497     |
| GO:0099177     | regulation of trans-synaptic signaling          | 0.04733191     |
| GO:0060291     | long-term synaptic potentiation                 | 0.04916304     |

**Table 7 GO terms enriched in the top 10% of genes positively associated with cortical mean diffusivity in preHD**

| <b>GO term</b> | <b>Description</b>                                       | <b>P value</b> |
|----------------|----------------------------------------------------------|----------------|
| GO:0048856     | anatomical structure development                         | 1.54E-15       |
| GO:0032502     | developmental process                                    | 2.80E-15       |
| GO:0009888     | tissue development                                       | 1.91E-14       |
| GO:0007275     | multicellular organism development                       | 1.96E-14       |
| GO:0048731     | system development                                       | 9.88E-14       |
| GO:0032501     | multicellular organismal process                         | 3.54E-13       |
| GO:0035295     | tube development                                         | 4.26E-13       |
| GO:0009653     | anatomical structure morphogenesis                       | 7.51E-13       |
| GO:0048513     | animal organ development                                 | 1.44E-12       |
| GO:0007166     | cell surface receptor signaling pathway                  | 2.12E-10       |
| GO:0072359     | circulatory system development                           | 6.14E-10       |
| GO:0050896     | response to stimulus                                     | 3.93E-09       |
| GO:0001655     | urogenital system development                            | 7.86E-09       |
| GO:0060429     | epithelium development                                   | 8.92E-09       |
| GO:0009887     | animal organ morphogenesis                               | 1.22E-08       |
| GO:0048729     | tissue morphogenesis                                     | 1.34E-08       |
| GO:0035239     | tube morphogenesis                                       | 1.59E-08       |
| GO:0048869     | cellular developmental process                           | 8.25E-08       |
| GO:0048646     | anatomical structure formation involved in morphogenesis | 8.64E-08       |
| GO:0051716     | cellular response to stimulus                            | 1.05E-07       |
| GO:0072001     | renal system development                                 | 1.18E-07       |
| GO:0030154     | cell differentiation                                     | 1.32E-07       |
| GO:0001568     | blood vessel development                                 | 1.68E-07       |
| GO:0007154     | cell communication                                       | 1.77E-07       |
| GO:0007165     | signal transduction                                      | 3.53E-07       |
| GO:0001822     | kidney development                                       | 3.92E-07       |
| GO:0023052     | signaling                                                | 3.97E-07       |
| GO:0001944     | vasculature development                                  | 5.54E-07       |
| GO:0030198     | extracellular matrix organization                        | 1.84E-06       |
| GO:0003012     | muscle system process                                    | 1.91E-06       |
| GO:0043062     | extracellular structure organization                     | 1.95E-06       |
| GO:0045229     | external encapsulating structure organization            | 2.19E-06       |
| GO:0050793     | regulation of developmental process                      | 3.51E-06       |
| GO:0061061     | muscle structure development                             | 7.71E-06       |
| GO:0042221     | response to chemical                                     | 1.63E-05       |
| GO:0051239     | regulation of multicellular organismal process           | 1.66E-05       |
| GO:0002009     | morphogenesis of an epithelium                           | 1.67E-05       |
| GO:0048514     | blood vessel morphogenesis                               | 2.20E-05       |
| GO:0048468     | cell development                                         | 2.64E-05       |
| GO:0008283     | cell population proliferation                            | 3.13E-05       |

|            |                                                         |            |
|------------|---------------------------------------------------------|------------|
| GO:0003013 | circulatory system process                              | 3.19E-05   |
| GO:0042127 | regulation of cell population proliferation             | 5.79E-05   |
| GO:0048598 | embryonic morphogenesis                                 | 7.12E-05   |
| GO:0007507 | heart development                                       | 7.50E-05   |
| GO:0006936 | muscle contraction                                      | 8.38E-05   |
| GO:0032835 | glomerulus development                                  | 9.26E-05   |
| GO:0072006 | nephron development                                     | 9.28E-05   |
| GO:0009790 | embryo development                                      | 0.00012768 |
| GO:0010646 | regulation of cell communication                        | 0.0001412  |
| GO:0023051 | regulation of signaling                                 | 0.00017321 |
| GO:0060485 | mesenchyme development                                  | 0.00018622 |
| GO:0007155 | cell adhesion                                           | 0.00020835 |
| GO:0060537 | muscle tissue development                               | 0.00023428 |
| GO:0040011 | locomotion                                              | 0.00026759 |
| GO:0050794 | regulation of cellular process                          | 0.00026773 |
| GO:0048523 | negative regulation of cellular process                 | 0.00027189 |
| GO:0016477 | cell migration                                          | 0.00030187 |
| GO:0048870 | cell motility                                           | 0.00034446 |
| GO:0051674 | localization of cell                                    | 0.00034446 |
| GO:0065007 | biological regulation                                   | 0.00044841 |
| GO:0050789 | regulation of biological process                        | 0.00051255 |
| GO:0009966 | regulation of signal transduction                       | 0.00052275 |
| GO:0001525 | angiogenesis                                            | 0.00057047 |
| GO:0070887 | cellular response to chemical stimulus                  | 0.00067304 |
| GO:0008015 | blood circulation                                       | 0.00106557 |
| GO:0010033 | response to organic substance                           | 0.00122756 |
| GO:0048583 | regulation of response to stimulus                      | 0.00123652 |
| GO:0003008 | system process                                          | 0.00148999 |
| GO:0007229 | integrin-mediated signaling pathway                     | 0.00181874 |
| GO:0051179 | localization                                            | 0.00193381 |
| GO:0003007 | heart morphogenesis                                     | 0.00250094 |
| GO:0030199 | collagen fibril organization                            | 0.0026993  |
| GO:0048518 | positive regulation of biological process               | 0.00271073 |
| GO:0051240 | positive regulation of multicellular organismal process | 0.00275833 |
| GO:0030334 | regulation of cell migration                            | 0.00276568 |
| GO:0072073 | kidney epithelium development                           | 0.0031418  |
| GO:0006928 | movement of cell or subcellular component               | 0.00339396 |
| GO:0072010 | glomerular epithelium development                       | 0.00381435 |
| GO:0065008 | regulation of biological quality                        | 0.00389224 |
| GO:2000145 | regulation of cell motility                             | 0.0040321  |
| GO:0051094 | positive regulation of developmental process            | 0.00413195 |
| GO:0048762 | mesenchymal cell differentiation                        | 0.00507172 |
| GO:0030855 | epithelial cell differentiation                         | 0.00553363 |

|            |                                                               |            |
|------------|---------------------------------------------------------------|------------|
| GO:0007399 | nervous system development                                    | 0.00560258 |
| GO:0009968 | negative regulation of signal transduction                    | 0.00627865 |
| GO:2000026 | regulation of multicellular organismal development            | 0.00736681 |
| GO:0051270 | regulation of cellular component movement                     | 0.00818478 |
| GO:0010648 | negative regulation of cell communication                     | 0.0082309  |
| GO:0023057 | negative regulation of signaling                              | 0.00902192 |
| GO:0048585 | negative regulation of response to stimulus                   | 0.00932869 |
| GO:0048568 | embryonic organ development                                   | 0.00972402 |
| GO:0040012 | regulation of locomotion                                      | 0.0109862  |
| GO:0010604 | positive regulation of macromolecule metabolic process        | 0.0109979  |
| GO:0098609 | cell-cell adhesion                                            | 0.01216966 |
| GO:0072009 | nephron epithelium development                                | 0.01602324 |
| GO:0032989 | cellular component morphogenesis                              | 0.01810838 |
| GO:0014706 | striated muscle tissue development                            | 0.0190118  |
| GO:0060562 | epithelial tube morphogenesis                                 | 0.02034281 |
| GO:0042592 | homeostatic process                                           | 0.02420401 |
| GO:0001704 | formation of primary germ layer                               | 0.02720685 |
| GO:0071310 | cellular response to organic substance                        | 0.02762537 |
| GO:0071560 | cellular response to transforming growth factor beta stimulus | 0.02935797 |
| GO:0030030 | cell projection organization                                  | 0.03114395 |
| GO:0071363 | cellular response to growth factor stimulus                   | 0.03323373 |
| GO:0009605 | response to external stimulus                                 | 0.03475315 |
| GO:0120036 | plasma membrane bounded cell projection organization          | 0.03617613 |
| GO:0035556 | intracellular signal transduction                             | 0.0367133  |
| GO:0071559 | response to transforming growth factor beta                   | 0.0387638  |
| GO:0048738 | cardiac muscle tissue development                             | 0.04269535 |
| GO:0022603 | regulation of anatomical structure morphogenesis              | 0.04573249 |
| GO:0045595 | regulation of cell differentiation                            | 0.04629331 |
| GO:0003015 | heart process                                                 | 0.04642439 |
| GO:0009893 | positive regulation of metabolic process                      | 0.04878945 |



**Table 8 GO terms enriched in the top 10% of genes negatively associated with cortical mean diffusivity in preHD**

| <b>GO Term</b> | <b>Description</b>                                         | <b>P value</b> |
|----------------|------------------------------------------------------------|----------------|
| GO:0045333     | cellular respiration                                       | 1.26E-14       |
| GO:0007005     | mitochondrion organization                                 | 2.54E-14       |
| GO:0042775     | mitochondrial ATP synthesis coupled electron transport     | 1.93E-13       |
| GO:0042773     | ATP synthesis coupled electron transport                   | 1.93E-13       |
| GO:0015980     | energy derivation by oxidation of organic compounds        | 4.21E-13       |
| GO:0022904     | respiratory electron transport chain                       | 1.01E-12       |
| GO:0009060     | aerobic respiration                                        | 1.03E-12       |
| GO:0019646     | aerobic electron transport chain                           | 1.64E-10       |
| GO:0006119     | oxidative phosphorylation                                  | 2.14E-10       |
| GO:0022900     | electron transport chain                                   | 3.81E-10       |
| GO:0006091     | generation of precursor metabolites and energy             | 2.18E-09       |
| GO:0046034     | ATP metabolic process                                      | 6.38E-07       |
| GO:0006996     | organelle organization                                     | 1.59E-05       |
| GO:0006120     | mitochondrial electron transport, NADH to ubiquinone       | 2.48E-05       |
| GO:0006626     | protein targeting to mitochondrion                         | 5.64E-05       |
| GO:0044260     | cellular macromolecule metabolic process                   | 9.04E-05       |
| GO:0044267     | cellular protein metabolic process                         | 0.0001117      |
| GO:0050794     | regulation of cellular process                             | 0.0001357      |
| GO:0070585     | protein localization to mitochondrion                      | 0.00016914     |
| GO:0019538     | protein metabolic process                                  | 0.00017657     |
| GO:1901564     | organonitrogen compound metabolic process                  | 0.00018942     |
| GO:0072655     | establishment of protein localization to mitochondrion     | 0.00040569     |
| GO:0006839     | mitochondrial transport                                    | 0.00062639     |
| GO:0044248     | cellular catabolic process                                 | 0.00071445     |
| GO:0044257     | cellular protein catabolic process                         | 0.00112269     |
| GO:0051603     | proteolysis involved in cellular protein catabolic process | 0.00218027     |
| GO:0030163     | protein catabolic process                                  | 0.0046225      |
| GO:0009987     | cellular process                                           | 0.00507333     |
| GO:0009057     | macromolecule catabolic process                            | 0.00520806     |
| GO:0007399     | nervous system development                                 | 0.00592441     |
| GO:0098662     | inorganic cation transmembrane transport                   | 0.00805982     |
| GO:0044265     | cellular macromolecule catabolic process                   | 0.01069508     |
| GO:0010257     | NADH dehydrogenase complex assembly                        | 0.01106478     |
| GO:0032981     | mitochondrial respiratory chain complex I assembly         | 0.01106478     |
| GO:0022411     | cellular component disassembly                             | 0.01165835     |
| GO:0098937     | anterograde dendritic transport                            | 0.01361016     |
| GO:0009056     | catabolic process                                          | 0.01593881     |
| GO:0098655     | cation transmembrane transport                             | 0.01699261     |
| GO:0033108     | mitochondrial respiratory chain complex assembly           | 0.01876829     |
| GO:1901565     | organonitrogen compound catabolic process                  | 0.02222081     |

|            |                                               |            |
|------------|-----------------------------------------------|------------|
| GO:0098660 | inorganic ion transmembrane transport         | 0.02463497 |
| GO:0007275 | multicellular organism development            | 0.02524858 |
| GO:0043043 | peptide biosynthetic process                  | 0.0306083  |
| GO:0048731 | system development                            | 0.03217434 |
| GO:0033043 | regulation of organelle organization          | 0.03999818 |
| GO:0006511 | ubiquitin-dependent protein catabolic process | 0.04714753 |
| GO:0006413 | translational initiation                      | 0.04913717 |

**Table 9 List of genes involved in neurodevelopment**

| <b>Gene</b> |
|-------------|
| CYP26A1     |
| TM6SF1      |
| OSTN        |
| TSHZ3       |
| SSX2IP      |
| FBXW7       |
| SATB2       |
| PART1       |
| MCHR2       |
| RORB        |

**Figure 5** Principal component analysis of developmental genes expression in the AHBA

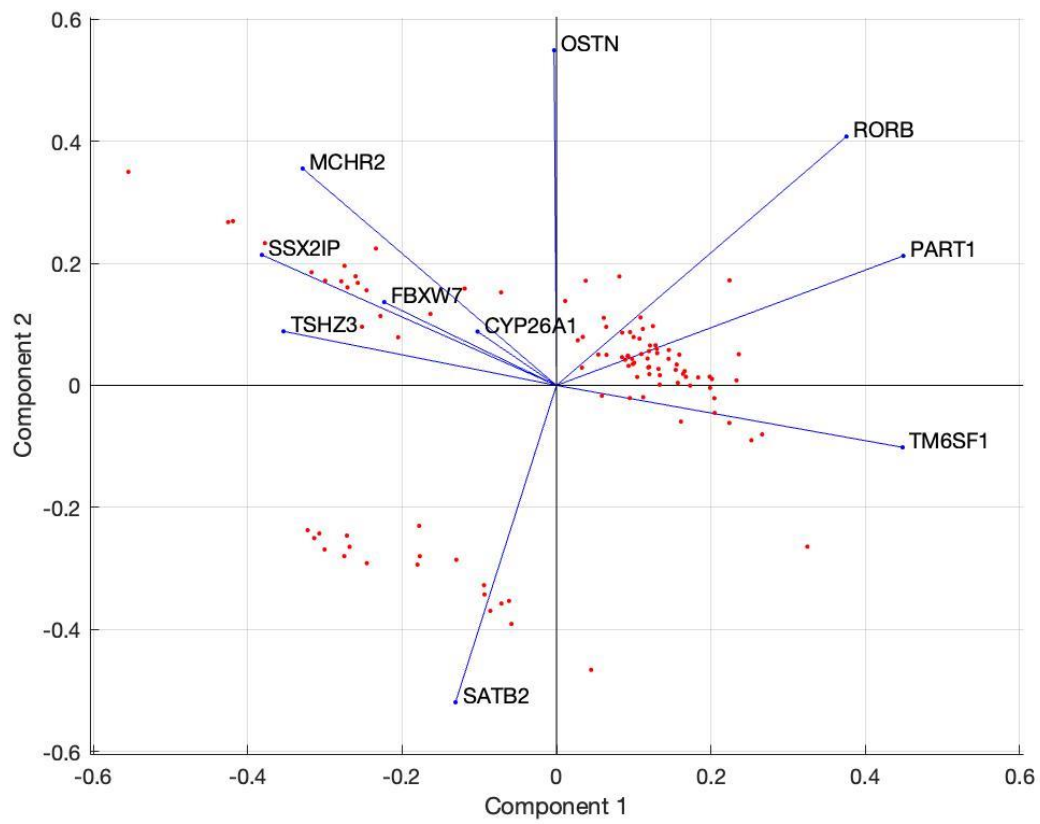

**Table 10 EWCE analysis showing cell types enriched within 10%, 20% and 30% genes positively associated with cortical volume loss using the AIBS single-cell transcription and the DroNC datasets**

| AIBS                  |            |                   |             |              |
|-----------------------|------------|-------------------|-------------|--------------|
| 10%                   |            |                   |             |              |
| CellType              | annotLevel | p                 | fold_change | sd_from_mean |
| Astrocyte             | 1          | 0                 | 1.353909108 | 8.299110199  |
| Endothelial cell      | 1          | 0                 | 1.516799804 | 9.576170262  |
| GABAergic             | 1          | 1                 | 0.738534785 | -6.922914949 |
| Glutamatergic         | 1          | 1                 | 0.733600131 | -6.578371223 |
| Microglia             | 1          | 1                 | 0.793471878 | -4.19261074  |
| Non-neuronal:Pericyte | 1          | 0.75432<br>4.00E- | 0.960598342 | -0.691413515 |
| Non-neuronal:VLMC     | 1          | 05                | 1.279232786 | 4.13019496   |
| Oligodendrocyte       | 1          | 1                 | 0.721085153 | -6.200361951 |
| OPC                   | 1          | 0.18284           | 1.036696015 | 0.898520698  |

| DroNC    |            |         |             |              |
|----------|------------|---------|-------------|--------------|
| 10%      |            |         |             |              |
| CellType | annotLevel | p       | fold_change | sd_from_mean |
| ASC      | 1          | 0       | 1.34645276  | 7.681571894  |
| END      | 1          | 0       | 1.63841465  | 11.89567123  |
| exCA     | 1          | 1       | 0.59021204  | -13.32384462 |
| exDG     | 1          | 1       | 0.63269777  | -10.87461207 |
| exPFC    | 1          | 1       | 0.50059859  | -16.41763955 |
| GABA     | 1          | 1       | 0.61327637  | -11.19780563 |
| MG       | 1          | 0.99708 | 0.80969043  | -2.52350314  |
| NSC      | 1          | 0       | 1.24142342  | 5.060028977  |
| ODC      | 1          | 1       | 0.54955331  | -7.749730421 |
| OPC      | 1          | 0.60126 | 0.98525926  | -0.284731918 |

| AIBS                  |            |                   |             |              |
|-----------------------|------------|-------------------|-------------|--------------|
| 20%                   |            |                   |             |              |
| CellType              | annotLevel | p                 | fold_change | sd_from_mean |
| Astrocyte             | 1          | 0                 | 1.387954424 | 13.04986428  |
| Endothelial cell      | 1          | 0                 | 1.42041461  | 11.22947896  |
| GABAergic             | 1          | 1                 | 0.804449293 | -7.379729741 |
| Glutamatergic         | 1          | 1                 | 0.745769084 | -8.921126631 |
| Microglia             | 1          | 0.9908            | 0.920356912 | -2.316692336 |
| Non-neuronal:Pericyte | 1          | 0.37204<br>3.00E- | 1.012548585 | 0.31840569   |
| Non-neuronal:VLMC     | 1          | 05                | 1.189860721 | 4.037591027  |
| Oligodendrocyte       | 1          | 1                 | 0.757901865 | -7.6506672   |

| DroNC    |            |         |             |              |
|----------|------------|---------|-------------|--------------|
| 20%      |            |         |             |              |
| CellType | annotLevel | p       | fold_change | sd_from_mean |
| ASC      | 1          | 0       | 1.39472975  | 12.59563621  |
| END      | 1          | 0       | 1.51561549  | 13.85855906  |
| exCA     | 1          | 1       | 0.66361888  | -15.60647869 |
| exDG     | 1          | 1       | 0.69890548  | -12.6708484  |
| exPFC    | 1          | 1       | 0.58189481  | -19.59729137 |
| GABA     | 1          | 1       | 0.69691564  | -12.60090874 |
| MG       | 1          | 0.97035 | 0.9039518   | -1.828687166 |
| NSC      | 1          | 0       | 1.20454417  | 6.140533943  |

|     |   |         |             |             |
|-----|---|---------|-------------|-------------|
| OPC | 1 | 0.00085 | 1.090628268 | 3.200649174 |
|-----|---|---------|-------------|-------------|

|     |   |         |            |              |
|-----|---|---------|------------|--------------|
| ODC | 1 | 1       | 0.66635522 | -8.198536756 |
| OPC | 1 | 0.00303 | 1.10283789 | 2.878642831  |

| AIBS                  |            |          |             |              |
|-----------------------|------------|----------|-------------|--------------|
| 30%                   |            |          |             |              |
| CellType              | annotLevel | p        | fold_change | sd_from_mean |
| Astrocyte             | 1          | 0        | 1.397611942 | 16.44271812  |
| Endothelial cell      | 1          | 0        | 1.380912729 | 12.62480903  |
| GABAergic             | 1          | 1        | 0.866094523 | -6.238653073 |
| Glutamatergic         | 1          | 1        | 0.806798537 | -8.371260052 |
| Microglia             | 1          | 0.92292  | 0.960600069 | -1.416590753 |
| Non-neuronal:Pericyte | 1          | 0.50275  | 0.999591887 | -0.012771994 |
| Non-neuronal:VLMC     | 1          | 0        | 1.188903604 | 5.003602412  |
| Oligodendrocyte       | 1          | 1        | 0.837830758 | -6.373554494 |
| OPC                   | 1          | 1.00E-05 | 1.111423885 | 4.863674521  |

| DroNC    |            |          |             |              |
|----------|------------|----------|-------------|--------------|
| 30%      |            |          |             |              |
| CellType | annotLevel | p        | fold_change | sd_from_mean |
| ASC      | 1          | 0        | 1.37236281  | 14.67029365  |
| END      | 1          | 0        | 1.45142747  | 15.0131092   |
| exCA     | 1          | 1        | 0.74458737  | -14.53057985 |
| exDG     | 1          | 1        | 0.77876976  | -11.49078209 |
| exPFC    | 1          | 1        | 0.67553844  | -18.55366635 |
| GABA     | 1          | 1        | 0.76399753  | -12.07368668 |
| MG       | 1          | 0.90296  | 0.94604369  | -1.284192224 |
| NSC      | 1          | 0        | 1.26414476  | 9.796549827  |
| ODC      | 1          | 1        | 0.74026644  | -7.93996173  |
| OPC      | 1          | 2.00E-05 | 1.12898849  | 4.471730526  |

**Table 11 EWCE analysis showing cell types enriched within 10%, 20% and 30% genes negatively associated with cortical volume loss using the AIBS single-cell transcription and the DroNC datasets**

| AIBS                  |            |         |             |              |
|-----------------------|------------|---------|-------------|--------------|
| 10%                   |            |         |             |              |
| CellType              | annotLevel | p       | fold_change | sd_from_mean |
| Astrocyte             | 1          | 1       | 0.751282621 | -5.727462114 |
| Endothelial cell      | 1          | 0.99989 | 0.814581303 | -3.418780092 |
| GABAergic             | 1          | 0       | 1.289338014 | 7.52885599   |
| Glutamatergic         | 1          | 0       | 1.528554718 | 12.80936116  |
| Microglia             | 1          | 0       | 1.39010846  | 7.758335161  |
| Non-neuronal:Pericyte | 1          | 0.69644 | 0.970273406 | -0.525157437 |
| Non-neuronal:VLMC     | 1          | 0.99705 | 0.820174552 | -2.649009422 |
| Oligodendrocyte       | 1          | 0.79633 | 0.962076806 | -0.837768296 |
| OPC                   | 1          | 0.27986 | 1.022792276 | 0.569506242  |

| DroNC    |            |         |             |              |
|----------|------------|---------|-------------|--------------|
| 10%      |            |         |             |              |
| CellType | annotLevel | p       | fold_change | sd_from_mean |
| ASC      | 1          | 1       | 0.80027258  | -4.43213217  |
| END      | 1          | 0.99025 | 0.8784664   | -2.249973205 |
| exCA     | 1          | 0       | 1.33124654  | 10.64371563  |
| exDG     | 1          | 0.00152 | 1.10149167  | 3.005049741  |
| exPFC    | 1          | 0       | 1.4859348   | 15.72430639  |
| GABA     | 1          | 0       | 1.26624524  | 7.683529119  |
| MG       | 1          | 0       | 1.78593381  | 10.1903561   |
| NSC      | 1          | 0.99978 | 0.83910096  | -3.310031996 |
| ODC      | 1          | 0.99818 | 0.84481744  | -2.678040506 |
| OPC      | 1          | 0.39886 | 1.01092488  | 0.223056891  |

| AIBS                  |            |         |             |              |
|-----------------------|------------|---------|-------------|--------------|
| 20%                   |            |         |             |              |
| CellType              | annotLevel | p       | fold_change | sd_from_mean |
| Astrocyte             | 1          | 1       | 0.830369495 | -5.529675154 |
| Endothelial cell      | 1          | 0.99573 | 0.901925372 | -2.556392234 |
| GABAergic             | 1          | 0       | 1.287058073 | 10.54751146  |
| Glutamatergic         | 1          | 0       | 1.466576669 | 15.91557349  |
| Microglia             | 1          | 0       | 1.26797107  | 7.626606066  |
| Non-neuronal:Pericyte | 1          | 0.04568 | 1.068445219 | 1.711651528  |
| Non-neuronal:VLMC     | 1          | 0.99612 | 0.876675157 | -2.58241197  |
| Oligodendrocyte       | 1          | 0.08639 | 1.043813719 | 1.373156167  |
| OPC                   | 1          | 0.10712 | 1.035487535 | 1.251155892  |

| DroNC    |            |         |             |              |
|----------|------------|---------|-------------|--------------|
| 20%      |            |         |             |              |
| CellType | annotLevel | p       | fold_change | sd_from_mean |
| ASC      | 1          | 0.99999 | 0.87785247  | -3.822395923 |
| END      | 1          | 0.85363 | 0.96010037  | -1.050318637 |
| exCA     | 1          | 0       | 1.32770586  | 14.86269279  |
| exDG     | 1          | 0       | 1.19127833  | 7.930293466  |
| exPFC    | 1          | 0       | 1.4434611   | 20.16325051  |
| GABA     | 1          | 0       | 1.28303969  | 11.51953786  |
| MG       | 1          | 0       | 1.49316224  | 9.084451396  |
| NSC      | 1          | 0.99899 | 0.8982038   | -2.988945989 |
| ODC      | 1          | 0.7016  | 0.97766114  | -0.545631638 |

|     |   |         |            |             |
|-----|---|---------|------------|-------------|
| OPC | 1 | 0.05555 | 1.05735533 | 1.627505857 |
|-----|---|---------|------------|-------------|

| AIBS                  |            |          |             |              |
|-----------------------|------------|----------|-------------|--------------|
| 30%                   |            |          |             |              |
| CellType              | annotLevel | p        | fold_change | sd_from_mean |
| Astrocyte             | 1          | 1        | 0.862459871 | -5.540648885 |
| Endothelial cell      | 1          | 0.98857  | 0.93147825  | -2.234802747 |
| GABAergic             | 1          | 0        | 1.28999972  | 13.11684996  |
| Glutamatergic         | 1          | 0        | 1.439123021 | 18.60834023  |
| Microglia             | 1          | 0        | 1.25202809  | 8.817074202  |
| Non-neuronal:Pericyte | 1          | 4.00E-05 | 1.127297005 | 3.909686486  |
| Non-neuronal:VLMC     | 1          | 0.85138  | 0.959930191 | -1.035120335 |
| Oligodendrocyte       | 1          | 0.00324  | 1.071824463 | 2.774391129  |
| OPC                   | 1          | 0.01531  | 1.050766218 | 2.212861758  |

| DroNC    |            |         |             |              |
|----------|------------|---------|-------------|--------------|
| 30%      |            |         |             |              |
| CellType | annotLevel | p       | fold_change | sd_from_mean |
| ASC      | 1          | 0.99966 | 0.91550453  | -3.277818412 |
| END      | 1          | 0.40793 | 1.00692061  | 0.226057812  |
| exCA     | 1          | 0       | 1.35385033  | 19.5968077   |
| exDG     | 1          | 0       | 1.25105204  | 12.79031289  |
| exPFC    | 1          | 0       | 1.44168807  | 24.52795228  |
| GABA     | 1          | 0       | 1.31477528  | 15.68834141  |
| MG       | 1          | 0       | 1.41549192  | 9.56641154   |
| NSC      | 1          | 0.96265 | 0.95129317  | -1.755631442 |
| ODC      | 1          | 0.2104  | 1.02650222  | 0.797334449  |
| OPC      | 1          | 0.0033  | 1.0804842   | 2.825918634  |



**Table 12 EWCE analysis showing cell types enriched within the top 10%, 20% and 30% genes positively associated with increases in cortical mean diffusivity using the AIBS single-cell transcription and the DroNC-seq datasets**

| AIBS                  |            |          |             |              |
|-----------------------|------------|----------|-------------|--------------|
| 10%                   |            |          |             |              |
| CellType              | annotLevel | p        | fold_change | sd_from_mean |
| Astrocyte             | 1          | 0        | 1.35185271  | 5.965243887  |
| Endothelial cell      | 1          | 0        | 1.383532471 | 5.15933219   |
| GABAergic             | 1          | 1        | 0.764747329 | -4.513687551 |
| Glutamatergic         | 1          | 1        | 0.515968606 | -8.687005258 |
| Microglia             | 1          | 0.99841  | 0.812427303 | -2.738085156 |
| Non-neuronal:Pericyte | 1          | 0        | 1.597978975 | 7.550388206  |
| Non-neuronal:VLMC     | 1          | 1.00E-04 | 1.378132796 | 4.100850647  |
| Oligodendrocyte       | 1          | 0.1977   | 1.052620864 | 0.842280753  |
| OPC                   | 1          | 0.99972  | 0.824903964 | -3.133989023 |

| DroNC    |            |         |             |              |
|----------|------------|---------|-------------|--------------|
| 10%      |            |         |             |              |
| CellType | annotLevel | p       | fold_change | sd_from_mean |
| ASC      | 1          | 0       | 1.57645664  | 9.439619241  |
| END      | 1          | 0       | 1.81610879  | 10.95365082  |
| exCA     | 1          | 1       | 0.73069223  | -6.486611145 |
| exDG     | 1          | 1       | 0.76689478  | -5.093094381 |
| exPFC    | 1          | 1       | 0.53267438  | -11.47162131 |
| GABA     | 1          | 1       | 0.74671923  | -5.419449608 |
| MG       | 1          | 0.14552 | 1.10897559  | 1.057910119  |
| NSC      | 1          | 0       | 1.55464919  | 8.412579734  |
| ODC      | 1          | 0.00252 | 1.24558354  | 3.068885649  |
| OPC      | 1          | 0.13744 | 1.07670855  | 1.095502269  |

| AIBS                  |            |          |             |              |
|-----------------------|------------|----------|-------------|--------------|
| 20%                   |            |          |             |              |
| CellType              | annotLevel | p        | fold_change | sd_from_mean |
| Astrocyte             | 1          | 0        | 1.383944686 | 9.196347063  |
| Endothelial cell      | 1          | 0        | 1.435999097 | 8.421329612  |
| GABAergic             | 1          | 1        | 0.699324611 | -8.198624807 |
| Glutamatergic         | 1          | 1        | 0.509830106 | -12.34887586 |
| Microglia             | 1          | 1        | 0.792791074 | -4.346796512 |
| Non-neuronal:Pericyte | 1          | 0        | 1.368420156 | 6.636156394  |
| Non-neuronal:VLMC     | 1          | 0        | 1.424895812 | 6.591154791  |
| Oligodendrocyte       | 1          | 1.00E-05 | 1.202255847 | 4.623958163  |
| OPC                   | 1          | 0.86693  | 0.957015424 | -1.112918905 |

| DroNC    |            |         |             |              |
|----------|------------|---------|-------------|--------------|
| 20%      |            |         |             |              |
| CellType | annotLevel | p       | fold_change | sd_from_mean |
| ASC      | 1          | 0       | 1.65282693  | 15.13185926  |
| END      | 1          | 0       | 1.76780964  | 14.6942955   |
| exCA     | 1          | 1       | 0.75641599  | -8.356195585 |
| exDG     | 1          | 1       | 0.79382443  | -6.40723919  |
| exPFC    | 1          | 1       | 0.56514223  | -15.02838872 |
| GABA     | 1          | 1       | 0.72455623  | -8.456312731 |
| MG       | 1          | 0.04684 | 1.12475163  | 1.741140073  |
| NSC      | 1          | 0       | 1.56951732  | 12.32739126  |
| ODC      | 1          | 0       | 1.56144376  | 10.00644032  |

|     |   |         |            |             |
|-----|---|---------|------------|-------------|
| OPC | 1 | 0.00011 | 1.20309904 | 4.199103427 |
|-----|---|---------|------------|-------------|

| AIBS                  |            |         |             |              |
|-----------------------|------------|---------|-------------|--------------|
| 30%                   |            |         |             |              |
| CellType              | annotLevel | p       | fold_change | sd_from_mean |
| Astrocyte             | 1          | 0       | 1.382850921 | 11.29501202  |
| Endothelial cell      | 1          | 0       | 1.396159021 | 9.436970635  |
| GABAergic             | 1          | 1       | 0.732107482 | -9.009602607 |
| Glutamatergic         | 1          | 1       | 0.555634931 | -13.82158626 |
| Microglia             | 1          | 1       | 0.84664604  | -3.952896771 |
| Non-neuronal:Pericyte | 1          | 0       | 1.260689751 | 5.798482975  |
| Non-neuronal:VLMC     | 1          | 0       | 1.322314901 | 6.191359495  |
| Oligodendrocyte       | 1          | 0       | 1.291017373 | 8.201278822  |
| OPC                   | 1          | 0.31509 | 1.0149275   | 0.476262662  |

| DroNC    |            |         |             |              |
|----------|------------|---------|-------------|--------------|
| 30%      |            |         |             |              |
| CellType | annotLevel | p       | fold_change | sd_from_mean |
| ASC      | 1          | 0       | 1.61890895  | 17.63355203  |
| END      | 1          | 0       | 1.63224827  | 14.92875228  |
| exCA     | 1          | 1       | 0.7709615   | -9.620361368 |
| exDG     | 1          | 1       | 0.83657619  | -6.229946588 |
| exPFC    | 1          | 1       | 0.60183042  | -16.84588449 |
| GABA     | 1          | 1       | 0.78075725  | -8.237305915 |
| MG       | 1          | 0.00822 | 1.14725194  | 2.524457876  |
| NSC      | 1          | 0       | 1.51140068  | 13.63013351  |
| ODC      | 1          | 0       | 1.6814185   | 14.93824617  |
| OPC      | 1          | 0       | 1.26664328  | 6.808969087  |

**Table 13 EWCE analysis showing cell types enriched within the top 10%, 20% and 30% of genes negatively associated with increases in cortical mean diffusivity in the AIBS single-cell transcription and the DroNC-seq datasets**

| AIBS                  |            |         |             |              |
|-----------------------|------------|---------|-------------|--------------|
| 10%                   |            |         |             |              |
| CellType              | annotLevel | p       | fold_change | sd_from_mean |
| GABAergic             | 1          | 0       | 1.291348408 | 9.489950106  |
| Glutamatergic         | 1          | 0       | 1.484499996 | 14.78665385  |
| Non-neuronal:Pericyte | 1          | 0       | 1.219889303 | 4.889603259  |
| Microglia             | 1          | 0.00172 | 1.119730932 | 3.021554323  |
| OPC                   | 1          | 0.46155 | 1.002562658 | 0.08015723   |
| Non-neuronal:VLMC     | 1          | 0.97458 | 0.896361968 | -1.916698458 |
| Endothelial cell      | 1          | 0.99997 | 0.830357137 | -3.967546737 |
| Astrocyte             | 1          | 1       | 0.829573919 | -4.893773863 |
| Oligodendrocyte       | 1          | 1       | 0.85369899  | -4.072890172 |

| DroNC    |            |         |             |              |
|----------|------------|---------|-------------|--------------|
| 10%      |            |         |             |              |
| CellType | annotLevel | p       | fold_change | sd_from_mean |
| ASC      | 1          | 1       | 0.819621187 | -5.023391842 |
| END      | 1          | 0.92599 | 0.938935174 | -1.427431723 |
| exCA     | 1          | 0       | 1.215025304 | 8.618050571  |
| exDG     | 1          | 0.00011 | 1.101974239 | 3.727088388  |
| exPFC    | 1          | 0       | 1.459022386 | 18.41862579  |
| GABA     | 1          | 0       | 1.255920963 | 9.150635384  |
| MG       | 1          | 0.00667 | 1.160439131 | 2.599697401  |
| NSC      | 1          | 0.98769 | 0.914757235 | -2.191907383 |
| ODC      | 1          | 1       | 0.72571792  | -5.866924314 |
| OPC      | 1          | 0.86503 | 0.956083392 | -1.098687253 |

| AIBS                  |            |         |             |              |
|-----------------------|------------|---------|-------------|--------------|
| 20%                   |            |         |             |              |
| CellType              | annotLevel | p       | fold_change | sd_from_mean |
| GABAergic             | 1          | 0       | 1.286047401 | 13.101303    |
| Glutamatergic         | 1          | 0       | 1.441544817 | 18.95089857  |
| Microglia             | 1          | 0       | 1.187823877 | 6.683467061  |
| Non-neuronal:Pericyte | 1          | 0       | 1.158757869 | 4.985545338  |
| OPC                   | 1          | 0.05471 | 1.036945062 | 1.617121386  |
| Non-neuronal:VLMC     | 1          | 0.98864 | 0.914475142 | -2.242078748 |
| Oligodendrocyte       | 1          | 0.99568 | 0.933883017 | -2.576048077 |
| Endothelial cell      | 1          | 0.99901 | 0.908885166 | -3.000791769 |
| Astrocyte             | 1          | 1       | 0.868018044 | -5.379917223 |

| DroNC    |            |          |             |              |
|----------|------------|----------|-------------|--------------|
| 20%      |            |          |             |              |
| CellType | annotLevel | p        | fold_change | sd_from_mean |
| ASC      | 1          | 1        | 0.84913928  | -5.890438794 |
| END      | 1          | 0.71124  | 0.982892451 | -0.566039462 |
| exCA     | 1          | 0        | 1.244824011 | 13.64126459  |
| exDG     | 1          | 0        | 1.148588791 | 7.645248349  |
| exPFC    | 1          | 0        | 1.417845641 | 23.49419983  |
| GABA     | 1          | 0        | 1.26250556  | 13.19528713  |
| MG       | 1          | 2.00E-05 | 1.19251754  | 4.461603984  |
| NSC      | 1          | 0.93793  | 0.957920005 | -1.531726174 |
| ODC      | 1          | 1        | 0.806806676 | -5.809776411 |
| OPC      | 1          | 0.50095  | 0.999434024 | -0.019834678 |

| <b>AIBS</b>           |                   |          |                    |                     |
|-----------------------|-------------------|----------|--------------------|---------------------|
| <b>30%</b>            |                   |          |                    |                     |
| <b>CellType</b>       | <b>annotLevel</b> | <b>p</b> | <b>fold_change</b> | <b>sd_from_mean</b> |
| GABAergic             | 1                 | 0        | 1.286047401        | 13.101303           |
| Glutamatergic         | 1                 | 0        | 1.441544817        | 18.95089857         |
| Microglia             | 1                 | 0        | 1.187823877        | 6.683467061         |
| Non-neuronal:Pericyte | 1                 | 0        | 1.158757869        | 4.985545338         |
| OPC                   | 1                 | 0.05471  | 1.036945062        | 1.617121386         |
| Non-neuronal:VLMC     | 1                 | 0.98864  | 0.914475142        | -2.242078748        |
| Oligodendrocyte       | 1                 | 0.99568  | 0.933883017        | -2.576048077        |
| Endothelial cell      | 1                 | 0.99901  | 0.908885166        | -3.000791769        |
| Astrocyte             | 1                 | 1        | 0.868018044        | -5.379917223        |

| <b>DroNC</b>    |                   |          |                    |                     |
|-----------------|-------------------|----------|--------------------|---------------------|
| <b>30%</b>      |                   |          |                    |                     |
| <b>CellType</b> | <b>annotLevel</b> | <b>p</b> | <b>fold_change</b> | <b>sd_from_mean</b> |
| ASC             | 1                 | 1        | 0.848994819        | -5.90012364         |
| END             | 1                 | 0.71285  | 0.982844042        | -0.56726714         |
| exCA            | 1                 | 0        | 1.24482382         | 13.63889306         |
| exDG            | 1                 | 0        | 1.148551837        | 7.621712438         |
| exPFC           | 1                 | 0        | 1.417915372        | 23.45320858         |
| GABA            | 1                 | 0        | 1.262678434        | 13.18277982         |
| MG              | 1                 | 3.00E-05 | 1.192544175        | 4.463107473         |
| NSC             | 1                 | 0.93874  | 0.957970694        | -1.534560019        |
| ODC             | 1                 | 1        | 0.806811657        | -5.867624034        |
| OPC             | 1                 | 0.49809  | 0.999504746        | -0.017354254        |
